# Supplementary material for: Effectiveness and cost-utility of a multifaceted eHealth strategy to improve back pain beliefs of patients with non-specific low back pain: a cluster randomised trial
Source: PubMed Central journal article supplement — BMJ Open. 2019 Dec 5;9(12):e030879. doi: 10.1136/bmjopen-2019-030879 (PMC6924789; doi:10.1136/bmjopen-2019-030879), 2019-12-05
Supplement: bmjopen-2019-030879.draft_revisions.pdf [file bmjopen-2019-030879.draft_revisions.pdf]

# BMJ Open

BMJ Open is committed to open peer review. As part of this commitment we make the peer review history of every article we publish publicly available.

When an article is published we post the peer reviewers' comments and the authors' responses online. We also post the versions of the paper that were used during peer review. These are the versions that the peer review comments apply to.

The versions of the paper that follow are the versions that were submitted during the peer review process. They are not the versions of record or the final published versions. They should not be cited or distributed as the published version of this manuscript.

BMJ Open is an open access journal and the full, final, typeset and author-corrected version of record of the manuscript is available on our site with no access controls, subscription charges or pay-per-view fees (<http://bmjopen.bmj.com>).

If you have any questions on BMJ Open's open peer review process please email [info.bmjopen@bmj.com](mailto:info.bmjopen@bmj.com)

# BMJ Open

## Effectiveness and cost-effectiveness of a multifaceted eHealth strategy to improve back pain beliefs of patients with non-specific low back pain: a cluster randomised trial

|                               |                                                                                                                                                                                                                                                                                                                                               |
|-------------------------------|-----------------------------------------------------------------------------------------------------------------------------------------------------------------------------------------------------------------------------------------------------------------------------------------------------------------------------------------------|
| Journal:                      | <i>BMJ Open</i>                                                                                                                                                                                                                                                                                                                               |
| Manuscript ID                 | bmjopen-2019-030879                                                                                                                                                                                                                                                                                                                           |
| Article Type:                 | Original research                                                                                                                                                                                                                                                                                                                             |
| Date Submitted by the Author: | 04-Apr-2019                                                                                                                                                                                                                                                                                                                                   |
| Complete List of Authors:     | Suman, Arnela; Amsterdam UMC - Locatie VUMC<br>Schaafsma, F; Amsterdam UMC - Locatie VUMC<br>van Dongen, Johanna M.; Vrije Universiteit Amsterdam<br>Elders, Petra; Amsterdam UMC - Locatie VUMC<br>Buchbinder, Rachelle; Monash University<br>Tulder, Maurits; Vrije Universiteit Amsterdam<br>Anema, Johannes; Amsterdam UMC - Locatie VUMC |
| Keywords:                     | LOW BACK PAIN, COSTS AND COST ANALYSIS, RANDOMIZED CONTROLLED TRIAL, E-HEALTH, OCCUPATIONAL HEALTH, HEALTH CARE ECONOMICS                                                                                                                                                                                                                     |
|                               |                                                                                                                                                                                                                                                                                                                                               |

SCHOLARONE™  
Manuscripts

1  
2  
3 1 **Effectiveness and cost-effectiveness of a multifaceted eHealth strategy to improve back**  
4  
5 2 **pain beliefs of patients with non-specific low back pain: a cluster randomised trial**  
6  
7  
8  
9 3

10  
11 4 Arnela Suman, Frederieke G. Schaafsma, Johanna M van Dongen, Petra JM Elders, Rachelle  
12  
13 5 Buchbinder, Maurits W van Tulder, Johannes R Anema  
14  
15  
16  
17 6

18  
19  
20 7 Corresponding author: Arnela Suman, Amsterdam UMC, VU University Amsterdam,  
21  
22 8 department of Public and Occupational Health, Amsterdam Public Health research institute,  
23  
24 9 De Boelelaan 1117, 1081HV Amsterdam, The Netherlands; [a.suman@vumc.nl](mailto:a.suman@vumc.nl); 0031-20-  
25  
26 10 4445685  
27  
28  
29

30 11  
31  
32  
33 12 Frederieke G Schaafsma, Amsterdam UMC, VU University Amsterdam, department of Public  
34  
35 13 and Occupational Health, Amsterdam Public Health research institute, Amsterdam, The  
36  
37 14 Netherlands  
38  
39  
40  
41 15

42  
43  
44 16 Johanna M van Dongen, VU University Amsterdam, department of Health Sciences,  
45  
46 17 Amsterdam Public Health research institute, Amsterdam, The Netherlands  
47  
48  
49  
50 18

51  
52  
53 19 Petra JM Elders, Amsterdam UMC, VU University Amsterdam, department of General  
54  
55 20 Practice and Elderly Care, Amsterdam Public Health research institute, Amsterdam, The  
56  
57 21 Netherlands  
58  
59  
60

1  
2  
3 22 Rachelle Buchbinder, Monash Department of Clinical Epidemiology, Cabrini Institute and  
4  
5 23 Department of Epidemiology and Preventive Medicine, School of Public Health & Preventive  
6  
7 24 Medicine, Monash University, Victoria, Australia  
8  
9

10  
11 25  
12

13  
14 26 Maurits W van Tulder, VU University Amsterdam, department of Health Sciences  
15  
16 27 Amsterdam Public Health research institute, Amsterdam, The Netherlands  
17  
18

19 28  
20

21  
22 29 Johannes R Anema, Amsterdam UMC, VU University Amsterdam, department of Public and  
23  
24 30 Occupational Health, Amsterdam Public Health research institute, Amsterdam, The  
25  
26 31 Netherlands  
27  
28

29  
30 32  
31

32 33 Word count: 3743  
34  
35  
36  
37  
38  
39  
40  
41  
42  
43  
44  
45  
46  
47  
48  
49  
50  
51  
52  
53  
54  
55  
56  
57  
58  
59  
60

1  
2  
3 34 **ABSTRACT**  
4  
5

6 35 **Background** Low back pain is the world's leading cause of disability and has a high burden  
7  
8 36 on individuals and societies. Many guidelines recommend self-management for patients with  
9  
10 37 low back pain. The current study aims to assess whether a multifaceted eHealth strategy is  
11  
12 38 effective and cost-effective compared to usual care in improving patients' back pain beliefs  
13  
14 39 and quality of life, and in decreasing their disability and absenteeism.  
15  
16

17  
18 40 **Methods** This study was a stepped wedge cluster randomised controlled trial with a parallel  
19  
20 41 economic evaluation performed from a societal perspective. Four clusters of general and  
21  
22 42 physiotherapy practices and occupational physicians were randomised and recruited patients  
23  
24 43 with low back pain for this study. 779 patients participated in this study, of which 331 were  
25  
26 44 randomised to the intervention group (multifaceted eHealth strategy), and 448 were  
27  
28 45 randomised to the control group (usual care). All patients were followed up at 3, 6, and 12  
29  
30 46 months.  
31  
32

33  
34  
35 47 **Results** There were no between-group differences in back pain beliefs or other health  
36  
37 48 outcomes at any time point. While the intervention group had lower costs due to absenteeism,  
38  
39 49 presenteeism, and unpaid productivity losses, none of the costs were significantly different to  
40  
41 50 the control group. At baseline, 37% of participants did not have back pain anymore.  
42  
43  
44

45 51 **Conclusion** The study results show that the multifaceted eHealth strategy was not effective or  
46  
47 52 cost-effective in improving patients' back pain beliefs and quality of life, and in decreasing  
48  
49 53 their disability and absenteeism.  
50  
51  
52

53 54 **Trial registration** Netherlands Trial Register (NTR), number: NTR4329.  
54  
55  
56

56 55  
57  
58  
59  
60

### 57 **Strengths and limitations of this study**

- 58 • Robust study design: stepped-wedge cluster randomised controlled trial
- 59 • Comprehensive, multifaceted e-Health strategy for low back pain
- 60 • Effectiveness and cost-effectiveness evaluated
- 61 • High rate of loss to follow-up in intervention group (40%) compared to control group  
62 (23%)

### 64 **Funding statement**

65 This study was funded by the Netherlands Organisation for Health Research and  
66 Development (ZonMw), grant number 80-83700-98-133053.

### 68 **Competing Interests**

69 All authors have completed the ICMJE uniform disclosure form at  
70 [www.icmje.org/coi\\_disclosure.pdf](http://www.icmje.org/coi_disclosure.pdf) and declare: no support from any organisation for the  
71 submitted work (other than funding agency); no financial relationships with any organisations  
72 that might have an interest in the submitted work in the previous three years; no other  
73 relationships or activities that could appear to have influenced the submitted work.

### 75 **Authors Statement**

76 AS collected, prepared, and analysed data and prepared the manuscript. JMvD assisted in  
77 cost-effectiveness analyses, interpreted data, and revised the manuscript. FGS, PJME, RB,

1  
2  
3 78 MWvT, and JRA were all involved in design of the study, interpretation of data, and revising  
4  
5 79 the manuscript for intellectual content.  
6  
7  
8  
9 80

10  
11 81 **Data sharing**  
12  
13

14  
15 82 Relevant data are available upon reasonable request.  
16  
17  
18 83

19  
20  
21  
22  
23  
24  
25  
26  
27  
28  
29  
30  
31  
32  
33  
34  
35  
36  
37  
38  
39  
40  
41  
42  
43  
44  
45  
46  
47  
48  
49  
50  
51  
52  
53  
54  
55  
56  
57  
58  
59  
60

For peer review only

## 84 BACKGROUND

85 Low back pain (LBP) is a major medical problem throughout the world. The global 1-month  
86 point prevalence is estimated to be 23.2%.<sup>[1]</sup> LBP is the leading cause of musculoskeletal and  
87 work disability, and years lived with disability (YLDs) worldwide.<sup>[2-3]</sup> Recent estimates from  
88 the Global Burden of Disease Study indicate that LBP accounts for 57 million YLDs, and that  
89 over 250 million people develop LBP annually.<sup>[2]</sup> The economic burden of LBP is high.  
90 Estimates of the annual economic burden of LBP vary from between AU\$9.17 billion in  
91 Australia, £12.3 billion in the UK, and US\$91 billion in the United States.<sup>[4-6]</sup> In the  
92 Netherlands, recent estimates report the costs of LBP to be around €1.3 billion, a quarter of all  
93 healthcare costs due to musculoskeletal disorders.<sup>[7]</sup> However, indirect costs due to  
94 absenteeism, and productivity losses due to disability are not included in this estimate.  
95 Previous research has shown that indirect costs make up 88% of all societal costs due to  
96 LBP.<sup>[8]</sup> Since LBP leads to a high proportion of work absence, the costs of LBP in the  
97 Netherlands are much higher than suggested.<sup>[7]</sup> Besides the burden on society, LBP has a high  
98 burden on the lives of individuals. Over the past decades, several studies have shown that  
99 people with negative back pain beliefs have more pain, disability, negative work-related  
100 outcomes (i.e. productivity loss and sickness absence), and higher health care utilization.<sup>[9-12]</sup>  
101 Many guidelines for LBP recommend self-management for patients, which is a reflection of a  
102 newly proposed definition of health, i.e. “health as the ability to adapt and self-manage.”<sup>[13-14]</sup>  
103 A systematic review on the effectiveness of education programmes designed to improve self-  
104 management suggested that these programmes are effective in improving pain intensity and  
105 disability, but did not measure actual self-management.<sup>[15]</sup>  
106 Underlined by the high economic, societal, and individual burden of LBP, no highly effective  
107 treatment for LBP has yet been found. However, eHealth, which is the provision of  
108 (personalised) health care at a distance (e.g. through internet and thus digital), has shown



1  
2  
3 109 promise with regards to its' effectiveness and cost-effectiveness in improving outcomes such  
4  
5 110 as patient health, patient satisfaction, self-management and healthcare costs in patients with  
6  
7 111 physical diseases.<sup>[16-17]</sup> Therefore, the current study aimed to assess whether a multifaceted  
8  
9 112 eHealth strategy to improve belief, knowledge, and self-management of LBP is effective and  
10  
11 113 cost-effective compared to usual care in improving patients' back pain beliefs and quality of  
12  
13  
14 114 life, and in decreasing their disability and absenteeism.  
15  
16  
17  
18 115

For peer review only

## 116 **METHODS**

### 117 **Study design**

118 This study was part of a cluster-randomised controlled trial that was registered in 2013 with  
119 the Netherlands Trial Register (NTR) under number NTR4329.<sup>[18]</sup> The Medical Ethics  
120 Committee of the VU University medical centre assessed this study's design and procedures,  
121 and in accordance with the local regulatory guidelines and standards for human subjects  
122 protection in the Netherlands (Medical Research Involving Human Subjects Act [WMO],  
123 2005), this study proved to be exempt from further medical ethical review. A detailed  
124 description of the design of this study has been published elsewhere.<sup>[18]</sup>

### 125 **Participants**

126 Twenty-five general practices, 19 physiotherapy practices, and 29 occupational physicians in  
127 the Amsterdam area participated in this study and recruited patients for this trial. Patients  
128 were aged 18-75 years and were diagnosed with nonspecific LBP by their general practitioner  
129 (GP) or physiotherapist (PT), whom they had visited due to back complaints no longer than 3  
130 months prior to inclusion in the study. Nonspecific LBP was defined as LBP with or without  
131 motor and/or sensory deficits in one or both legs, including sciatica and radiculopathy, that is  
132 not caused by underlying specific pathology (red flags), i.e. a tumour, (osteoporotic) vertebral  
133 fracture, ankylosing spondylitis, and cauda equina syndrome. Exclusion criteria were: serious  
134 comorbidities including Alzheimer's disease, multiple sclerosis, Parkinson's disease,  
135 amyotrophic lateral sclerosis, cerebrovascular accident in the last year, confirmed pregnancy  
136 in the last year, malignancy in the last five years, and severe psychiatric disorders, i.e.  
137 schizophrenia and bipolar disorder.

### 138 **Randomisation**

1  
2  
3 139 This study was a stepped-wedge cluster randomised controlled trial. The participating general  
4  
5 140 practices, physiotherapy practices, and occupational physicians were assigned to one of four  
6  
7 141 clusters based on their geographic proximity to each other. The clusters sequentially received  
8  
9 142 a multifaceted continuing medical education training (see Figure 1). This clustering allowed  
10  
11 143 for minimisation of contamination between the participants. Patients were allocated according  
12  
13 144 to the group their general practitioner, physiotherapist or occupational physician were  
14  
15 145 assigned, i.e., patients registered within a practice that was in the control group at time of  
16  
17 146 enrolment were allocated to the control group for patients. Randomisation was performed by  
18  
19 147 means of computer-generated allocation. An independent research assistant performed the  
20  
21 148 concealed allocation, enrolling of participants, and assignment of participants to groups.  
22  
23  
24  
25  
26

### 27 149 **Intervention and control**

28  
29  
30 150 The intervention was provided to patients on an individual level. Patients in the cluster whose  
31  
32 151 GP or PT was randomised into the intervention group received access to a multifaceted  
33  
34 152 eHealth strategy that aimed to reduce patients' negative back pain beliefs and improve their  
35  
36 153 knowledge and self-management of LBP. The campaign included an informative website,  
37  
38 154 digital monthly newsletters, and social media platforms. The website provided comprehensive  
39  
40 155 information about LBP, such as practical advice (e.g. on self-management), working and  
41  
42 156 returning to work with LBP, exercise tips, and short video messages. In these videos, actors  
43  
44 157 and healthcare professionals shared their experiences with LBP and provided tips on self-  
45  
46 158 management, coping, and working with LBP. The videos were inspired by the effective  
47  
48 159 Australian mass media campaign 'Back Pain: Don't Take It Lying Down'.<sup>[19]</sup> Social media  
49  
50 160 platforms included a forum on the website, and a Facebook page where patients could contact  
51  
52 161 researchers, healthcare providers, and other patients. All parts of the intervention were also  
53  
54 162 available in a mobile version that was adaptive to any electronic device. The patient  
55  
56 163 intervention was supported by continuing medical education for GPs, PTs, and occupational  
57  
58  
59  
60

1  
2  
3 164 physicians (OPs). More detailed descriptions of the patient and professional based  
4  
5 165 interventions are published elsewhere.<sup>[20-21]</sup> Patients in the control group received a digital  
6  
7 166 patient information letter and had no access to the intervention website, materials or social  
8  
9 167 media platforms. Results of the professional based intervention will be published elsewhere.  
10  
11  
12

### 13 168 **Sample size and outcomes**

14  
15  
16 169 The primary outcome measure was back pain beliefs, assessed using the Back Beliefs  
17  
18 170 Questionnaire (BBQ). The BBQ is designed to measure the inevitable consequences of LBP  
19  
20 171 (e.g. there is no real treatment for back trouble, back trouble must be rested). It is a validated  
21  
22 172 questionnaire consisting of 14 items, and rates back pain beliefs on a scale of 9 to 45, with  
23  
24 173 higher scores indicating more positive (better) back pain beliefs (e.g. exercising through LBP  
25  
26 174 is good).<sup>[22-23]</sup>  
27  
28  
29

30  
31 175 The sample size calculation was based on a hypothesized 10% improvement in back pain  
32  
33 176 beliefs as measured by the BBQ, based on an observed mean improvement of 9.6% between  
34  
35 177 three successive surveys in the Australian campaign.<sup>[19]</sup> An intra-class correlation coefficient  
36  
37 178 (ICC) of 0.05 was applied to adjust for the cluster randomisation design. Assuming a 10 %  
38  
39 179 improvement from a mean score of 26.5 (95% Confidence Interval (CI) 26.1-26.8, SD 6) on  
40  
41 180 the BBQ, and applying an ICC of 0.05, the necessary sample size was estimated to be 500  
42  
43 181 patients. This calculation takes into account a dropout-rate of 20%, power (1-beta) of 0.90 and  
44  
45 182 an alpha of 0.05.  
46  
47  
48  
49

50 183 The secondary outcomes included disability, measured with the Roland Disability  
51  
52 184 Questionnaire (RDQ-24), which has been shown to be a valid and reliable instrument for  
53  
54 185 patients with LBP.<sup>[24]</sup> The RDQ-24 consists of 24 items, rating disability on a scale of 0 to 24,  
55  
56 186 with higher scores indicating more disability. The EQ-5D-3L was used to measure quality of  
57  
58 187 life.<sup>[25]</sup> Health care use, absenteeism, presenteeism and unpaid productivity losses were  
59  
60

1  
2  
3 188 measured with the generic PROductivity and DIsease Questionnaire (PRODISQ) and the  
4  
5 189 Healthcare Utilization and Productivity Losses Questionnaire (TIC-P).<sup>[26-27]</sup> All outcomes  
6  
7  
8 190 were measured at baseline and after 3, 6, and 12 months follow-up.  
9

10  
11 191 For the economic evaluation, the scores on the EQ-5D-3L were converted into utility scores  
12  
13 192 using the Dutch tariff.<sup>[28]</sup> These utility scores range from 0 (death) to 1 (maximum health.  
14  
15 193 Quality adjusted life years (QALYs) were calculated using linear interpolation between  
16  
17 194 measurement points. Societal costs included intervention costs, costs for the use of healthcare,  
18  
19 195 and costs for informal care (e.g. care by family and other volunteers), work absenteeism, and  
20  
21 196 paid and unpaid productivity losses. The intervention costs comprised all costs for the  
22  
23 197 development and implementation of the intervention, including costs for materials and  
24  
25 198 personnel (Appendix 1). There were no costs for the intervention for the control group.  
26  
27 199 Healthcare utilization included primary healthcare (e.g. GP, PT), secondary healthcare (e.g.  
28  
29 200 diagnostic imaging, medical specialist), alternative healthcare (e.g. acupuncture or massage),  
30  
31 201 and medication (both prescribed and over-the-counter).  
32  
33  
34  
35  
36

37 202 To value healthcare utilization, prices from the Dutch Manual for Costing (DMC) were  
38  
39 203 used.<sup>[29]</sup> Where standard costs were unavailable, we used prices provided by professional  
40  
41 204 organizations. Medication use was valued using the prices of the Royal Dutch Society of  
42  
43 205 Pharmacy.<sup>[30]</sup> Informal care was valued using a recommended Dutch shadow price according  
44  
45 206 to the DMC.<sup>[29]</sup> Absenteeism was calculated and valued using patient data collected with the  
46  
47 207 PRODISQ and TIC-P. In accordance with the DMC, patients' daily absenteeism cost was  
48  
49 208 calculated by dividing their self-reported gross annual salary by their total number of  
50  
51 209 workable days per year. Using the Friction Cost Approach (FCA, friction period 23 weeks),  
52  
53 210 absenteeism costs were estimated by multiplying the total number of sick leave days during  
54  
55 211 follow-up by their associated costs. Presenteeism was calculated using patient data collected  
56  
57 212 with the TIC-P questionnaire, where patients indicated how many days they went to work  
58  
59  
60

1  
2  
3 213 while having LBP. To obtain workday equivalents lost to presenteeism, this number of days  
4  
5 214 was multiplied by a self-reported inefficiency score ranging between 0 (could not perform any  
6  
7 215 tasks) and 1 (could perform all tasks as efficient as without LBP). Presenteeism costs were  
8  
9 216 subsequently calculated by multiplying the total number of presenteeism days by their  
10  
11 217 associated costs.

## 15 218 **Statistical analyses**

17  
18 219 Analyses were performed according to the intention-to-treat principle. Descriptive statistics  
19  
20 220 were used to compare baseline characteristics between intervention and control group  
21  
22 221 participants as well as between participants with complete and incomplete data. Missing  
23  
24 222 values for costs and effects were imputed using multiple imputation, and imputations were  
25  
26 223 performed separately for the intervention and control group.<sup>[31-32]</sup> Effectiveness analyses were  
27  
28 224 performed using maximum likelihood estimation longitudinal mixed-effects models with  
29  
30 225 multilevel structure and ‘missing at random’ assumptions.<sup>[33]</sup> The mixed-effects models  
31  
32 226 adjusted for the effect of clustering. Analyses of effect and cost data were performed in Stata  
33  
34 227 14, and the statistical significance level was set at  $p < 0.05$ . Regression coefficients or odds  
35  
36 228 ratios (ORs) were calculated with 95%-confidence intervals (CIs).

37  
38 229 Cost-effectiveness analysis (CEA) and cost-utility analysis (CUA) were performed from a  
39  
40 230 societal perspective. Imputation models included intervention costs, age, gender, educational  
41  
42 231 level, nationality, being employed, performing physically demanding work, physical activity  
43  
44 232 (minutes per week), and available cost and effect measure values. Using predictive mean  
45  
46 233 matching, 10 complete data sets were created (loss-of-efficiency 5%).<sup>[34]</sup> Pooled estimates  
47  
48 234 were calculated using Rubin’s rules.<sup>[35]</sup> Cost and effect difference estimates between  
49  
50 235 intervention and control group were analysed using seemingly unrelated regression (SUR),  
51  
52 236 while simultaneously adjusting for the possible correlation between costs and effects.<sup>[36]</sup>  
53  
54  
55  
56  
57  
58  
59  
60

1  
2  
3 237 Incremental cost-effectiveness ratios (ICERs) were calculated by dividing the adjusted mean  
4  
5 238 cost differences by those in effects. Uncertainty surrounding the cost differences and ICERs  
6  
7  
8 239 was estimated using Bias Corrected and Accelerated bootstrapping (BCA) with 5000  
9  
10 240 replications, and presented by 95%-CIs and plotted on cost-effectiveness planes.<sup>[37]</sup> Cost-  
11  
12 241 effectiveness acceptability curves (CEACs) presented the probability of the intervention being  
13  
14 242 cost-effectiveness at different values of willingness to pay.<sup>[38]</sup>

### 17 243 **Patient involvement**

18  
19  
20  
21 244 The Dutch patient association for spinal disorders (“NVV De Wervelkolom”) was involved in  
22  
23 245 the design of this study and provided advice about the content of the intervention.  
24  
25

26 246  
27  
28  
29  
30  
31  
32  
33  
34  
35  
36  
37  
38  
39  
40  
41  
42  
43  
44  
45  
46  
47  
48  
49  
50  
51  
52  
53  
54  
55  
56  
57  
58  
59  
60

## 247 **RESULTS**

### 248 **Participants**

249 In total, 5181 eligible patients were invited to participate in this study. Of these patients, 779  
250 (response rate of 15%) agreed to participate and were randomised to the intervention (n=331)  
251 and control (n=448) groups (Figure 2). Follow-up responses in the intervention group were  
252 69.8% at 3 months follow-up, 70.1% at 6 months follow-up, and 60.4% at 12 months follow-  
253 up. The follow-up responses in the control group were higher than in the intervention group at  
254 3 months follow-up (77%) and 12 months follow-up (77.5%). At 6 months follow up the  
255 responses in the control group were similar to those in the intervention group (69.6%).

256 At baseline, characteristics of patients in the intervention group were similar to those in the  
257 control group. Table 1 shows that a high percentage of participants were female, 60%  
258 (intervention group) and 57% (control group) had a high educational level, and over half of  
259 the participants were employed. They performed about 3 hours of physical activity per week.  
260 Table 1 also shows the baseline scores on the BBQ, RDQ-24, absenteeism, and quality of life  
261 for both groups. At baseline, there was a lower absenteeism rate in the intervention group  
262 compared to the control group.



263 *Table 1. Baseline characteristics of patients*

|                                                                                                                             | <b>Intervention (n=331)</b> | <b>Control (n=448)</b> |
|-----------------------------------------------------------------------------------------------------------------------------|-----------------------------|------------------------|
| <b>Mean age (SD)</b>                                                                                                        | 55.7 (13.9) (n=320)         | 56.6 (14.6) (n=439)    |
| <b>Female gender (%)</b>                                                                                                    | 188 (59) (n=320)            | 252 (57) (n=439)       |
| <b>Back pain at baseline (%)</b>                                                                                            | 201 (63) (n=320)            | 275 (63) (n=439)       |
| <b>Nationality (%)</b>                                                                                                      | (n=320)                     | (n=439)                |
| - Dutch                                                                                                                     | 298 (93)                    | 409 (93)               |
| - Western countries immigrant                                                                                               | 16 (5)                      | 23 (5)                 |
| - Non-western countries immigrant                                                                                           | 6 (2)                       | 7 (2)                  |
| <b>Educational level (%)</b>                                                                                                | (n=320)                     | (n=439)                |
| - None (never attended school):                                                                                             | 9 (3)                       | 12 (3)                 |
| - Lower                                                                                                                     | 25 (8)                      | 42 (10)                |
| - Vocational                                                                                                                | 92 (29)                     | 134 (30)               |
| - Higher                                                                                                                    | 194 (60)                    | 251 (57)               |
| <b>Activity minutes/week (SD)</b>                                                                                           | 161 (109) (n=196)           | 166 (104) (n=254)      |
| <b>Employed (paid work) (%)</b>                                                                                             | 183 (57) (n=320)            | 232 (53) (n=439)       |
| <b>Physically demanding work (%)</b>                                                                                        | 88 (28) (n=320)             | 121 (28) (n=439)       |
| <b>Back pain beliefs</b><br><i>(measured by BBQ, range 9-45; higher score means more positive back pain beliefs)</i>        | 24.7 (6.0) (n=295)          | 24.8 (6.2) (n=394)     |
| <b>Disability</b><br><i>(measured by RDQ-24, range 0-24; higher score means more disability)</i>                            | 5.1 (4.7) (n=317)           | 5.9 (5.3) (n=434)      |
| <b>Absenteeism</b> <i>(self-reported number of days over past three months)</i>                                             | 2.2 (7.0) (n=187)           | 4.0 (13.2) (n=246)     |
| <b>Quality of life</b><br><i>(utility score measured by EQ-5D; range 0 to 1; higher score means better quality of life)</i> | 0.79 (0.22) (n=331)         | 0.75 (0.25) (n=448)    |

264

265 **Intention-to-treat effectiveness analysis**

266 Table 2 shows the mean scores on the BBQ, RDQ-24, absenteeism, and quality of life of the  
 267 intervention group compared to the control group. Table 3 shows the results of the intention-  
 268 to-treat analysis. There were no significant differences in back pain beliefs, disability and  
 269 absenteeism between groups at any time point. The interaction term with gender was  
 270 significant for disability, showing that the effect for males was larger than that for females.

271

272 *Table 2. Mean scores (SD) on BBQ, RDQ-24, EQ-5D and absenteeism*

|                           |                                                                                                                                |                           |                            |
|---------------------------|--------------------------------------------------------------------------------------------------------------------------------|---------------------------|----------------------------|
|                           | <b>Mean (SD) back pain beliefs</b><br><i>(measured by BBQ, range 9-45; higher score means more positive back pain beliefs)</i> |                           |                            |
|                           | <b>3 months follow-up</b>                                                                                                      | <b>6 months follow-up</b> | <b>12 months follow-up</b> |
| <b>Intervention group</b> | 24.4 (5.8)                                                                                                                     | 24.0 (5.9)                | 24.1 (5.8)                 |
| <b>Control group</b>      | 24.9 (6.2)                                                                                                                     | 24.6 (6.0)                | 24.1 (6.3)                 |
|                           | <b>Mean (SD) disability</b><br><i>(measured by RDQ-24, range 0-24; higher score means more disability)</i>                     |                           |                            |
|                           | <b>3 months follow-up</b>                                                                                                      | <b>6 months follow-up</b> | <b>12 months follow-up</b> |
| <b>Intervention group</b> | 4.4 (4.7)                                                                                                                      | 3.9 (4.3)                 | 3.9 (4.3)                  |
| <b>Control group</b>      | 5.2 (5.1)                                                                                                                      | 4.8 (4.8)                 | 4.5 (4.7)                  |
|                           | <b>Mean (SD) absenteeism</b><br><i>(self-reported number of days over past three months)</i>                                   |                           |                            |
|                           | <b>3 months follow-up</b>                                                                                                      | <b>6 months follow-up</b> | <b>12 months follow-up</b> |

|                           |                                                                                                                                       |                           |                            |
|---------------------------|---------------------------------------------------------------------------------------------------------------------------------------|---------------------------|----------------------------|
| <b>Intervention group</b> | 1.2 (6.5)                                                                                                                             | 0.9 (4.8)                 | 0.7 (2.7)                  |
| <b>Control group</b>      | 2.6 (9.8)                                                                                                                             | 0.7 (4.1)                 | 0.7 (4.4)                  |
|                           | <b>Mean (SD) quality of life</b><br><i>(utility score measured by EQ-5D; range 0 to 1; higher score means better quality of life)</i> |                           |                            |
|                           | <b>3 months follow-up</b>                                                                                                             | <b>6 months follow-up</b> | <b>12 months follow-up</b> |
| <b>Intervention group</b> | 0.86 (0.21)                                                                                                                           | 0.90 (0.16)               | 0.91 (0.15)                |
| <b>Control group</b>      | 0.82 (0.24)                                                                                                                           | 0.86 (0.21)               | 0.87 (0.19)                |

273

274 *Table 3. Adjusted effects of the intervention based on intention-to-treat analyses*

| <b>Outcome</b>                   |   | <b>Difference between intervention and control</b> | <b>95%-CI</b> |
|----------------------------------|---|----------------------------------------------------|---------------|
| <b>Back beliefs<sup>1</sup></b>  |   | -0.13                                              | -0.90;0.65    |
| <b>Disability</b>                | M | -1.13                                              | 0.93;1.37     |
|                                  | F | -0.79                                              | 0.68;0.93     |
| <b>Absenteeism<sup>2;3</sup></b> |   | -0.94                                              | 0.69;1.29     |

275 1: Adjusted for educational level, physical activity, having back pain, being employed, comorbidity; 2: Adjusted  
 276 for age, physical activity, having back pain; 3: Only for participants who were employed at baseline  
 277 (intervention group n=183; control group n=232)

278

279 **Cost-effectiveness analysis**

280 Intervention costs per patient were € 70. Direct costs for primary care and medication were  
 281 lower in the intervention than in the control group, while direct costs for secondary and  
 282 alternative care were higher in the intervention than in the control group. Indirect costs due to

absenteeism, presenteeism, and unpaid productivity loss were lower in the intervention than in the control group. The crude total cost differences were not significant (Table 4).

Table 4. Crude costs per cost category in euros (€)

| Cost category               | Mean costs (SEM) in € |            | Δ Costs (95%-CI) in € |
|-----------------------------|-----------------------|------------|-----------------------|
|                             | Intervention          | Control    |                       |
| <b>Direct costs</b>         |                       |            |                       |
| Primary care                | 340 (26)              | 405 (26)   | -65 (-134;-2)         |
| Secondary care              | 478 (228)             | 229 (42)   | 249 (58;515)          |
| Alternative care            | 742 (218)             | 322 (55)   | 421 (182;722)         |
| Medication                  | 29 (7)                | 44 (9)     | -15 (-45;-0.70)       |
| Intervention                | 70                    | 0          | 70 (N/A)              |
| <b>Indirect costs</b>       |                       |            |                       |
| Absenteeism                 | 1034 (242)            | 1547 (235) | -513 (-941;-77)       |
| Presenteeism                | 5735 (681)            | 6342 (537) | -607 (-2076;-831)     |
| Unpaid productivity         | 4000 (887)            | 5047 (616) | -1047 (-1954;-203)    |
| <b>Total societal costs</b> | 8444 (820)            | 8979 (619) | -535 (-2230;1172)     |

There was no statistically significant difference in QALYs (adjusted for age, gender, educational level, nationality, employment, and physically demanding work) over the 12-month follow-up period between the control and intervention group (adjusted ΔE 0.04; 95%-CI 0.02;0.06). The intervention did not yield significant cost savings (adjusted for age, gender, educational level, nationality, employment, and physically demanding work ΔC € -748 per patient; 95%-CI € -2341;878). The ICER for QALYs was -18,353, which indicates

1  
2  
3 294 that one QALY gained was associated with a societal cost saving of € 18,353. The majority  
4  
5 295 (79%) of incremental cost-effectiveness pairs was located in the southeast quadrant of the  
6  
7 296 cost-effectiveness plane (Figure 3), indicating that the intervention was on average more  
8  
9 297 effective and less costly. The uncertainty around the cost-effectiveness estimate was large.  
10  
11  
12 298 Figure 4 shows that the intervention has probability of 0.88 of being cost-effective on a  
13  
14 299 willingness-to-pay of €10.000 per QALY gained, increasing to a probability of 1.00 on a  
15  
16  
17 300 willingness-to-pay of € 80.000 per QALY gained.  
18  
19  
20 301

## 302 DISCUSSION

303 This study evaluated whether a multifaceted eHealth strategy is effective and cost-effective  
304 compared to usual care in improving patients' back pain beliefs and quality of life, and in  
305 decreasing their disability and absenteeism. The study results show that the campaign was not  
306 effective on these outcomes. The probability of cost-effectiveness was high: 0.88 per QALY  
307 gained at a willingness-to-pay threshold of € 10.000, and increased to a maximum probability  
308 of 1 per QALY gained at a willingness-to-pay threshold of € 80.000.

309 A possible explanation for the lack of effectiveness might be that in this study, almost 40% of  
310 participants did not have back pain anymore at the start of the actual intervention (i.e. baseline  
311 moment). Patients who had visited their general practitioner or physiotherapist no longer than  
312 3 months prior to recruitment could participate in this study. As a consequence, some patients  
313 may have agreed to participate while they had already recovered from their LBP at the start of  
314 the intervention. With the recruitment protocol used it was not possible to select only the  
315 chronic LBP cases. Therefore, the intervention may no longer have been necessary for the  
316 participants that did not have LBP at the start of the intervention, and for them effectiveness  
317 was not to be expected. The back beliefs of the study population were quite low at baseline  
318 compared to those of the Australian mass media campaign by which the current study was  
319 inspired. Mean BBQ scores in the Australian study were 26.5 at the start of the campaign and  
320 increased significantly to 29.7, while in the current study the BBQ scores were 24.7 and 24.8  
321 in the intervention and control groups, respectively. This indicates that there was room for  
322 improvement in back pain beliefs in the current study.<sup>[39]</sup> Another study that assessed factors  
323 that were associated with beliefs and attitudes of elderly (mean age 69) also found low back  
324 pain beliefs scores (mean 23.7).<sup>[40]</sup> In the current study disability scores measured with the  
325 RDQ-24 showed low levels of disability, and absenteeism rates were also low. Quality of life  
326 scores were relatively high and similar between groups with no further improvement over

1  
2  
3 327 time. It is arguable that the participating patients were in good health states from the start and  
4  
5 328 gaining much improvement on these functional outcomes was not realistic. Process  
6  
7 329 evaluations among participating patients and professionals alongside the present study  
8  
9 330 showed that compliance with the intervention was very low. Most patients did not comply to  
10  
11 331 the full e-health intervention: 31% of the participants had not used the campaign materials at  
12  
13 332 all, and 42.9% had only used it once, and professionals almost never discussed the  
14  
15 333 intervention with their patients. Probably most participants did not need the intervention to  
16  
17 334 improve their functional ability, but improvement in back pain beliefs could have been  
18  
19 335 possible had the compliance rates in this study have been higher.<sup>[20-21]</sup>

20  
21  
22  
23  
24 336 Self-management is recommended for the management of LBP, and healthcare professionals  
25  
26 337 are advised to provide advice and information, tailored to needs and capabilities, to help  
27  
28 338 patients self-manage their LBP.<sup>[41]</sup> One possible way to help patients self-manage their LBP is  
29  
30 339 through an eHealth strategy, but evidence regarding the most effective content and mode of  
31  
32 340 delivery for self-management options is lacking.<sup>[42]</sup> eHealth is easy to deliver, safe, and  
33  
34 341 usually inexpensive (e.g. in the current study, the intervention costs were less than € 70,- per  
35  
36 342 patient), a recent systematic review on digital support intervention for LBP could not find  
37  
38 343 significant beneficial effects of digital self-management interventions.<sup>[43]</sup> However, most of  
39  
40 344 the participants in the included studies were Caucasian, highly educated, middle-aged  
41  
42 345 females, meaning that the findings of the current study are comparable to similar studies. The  
43  
44 346 results of the current study are in line with other studies that have attempted to improve  
45  
46 347 patient outcomes and costs in LBP by using multifaceted strategies. A systematic review of  
47  
48 348 the effectiveness of multifaceted strategies for guideline implementation in LBP and neck  
49  
50 349 pain did not find that multifaceted strategies changed patient outcomes or costs of care.<sup>[44]</sup>  
51  
52 350 However, the majority of the studies included in the review did not provide insight into the  
53  
54 351 implementation process, raising the question whether the lack of effectiveness is caused by  
55  
56  
57  
58  
59  
60

1  
2  
3 352 the failure of the theory (multifaceted strategy) or by failure of the implementation process,  
4  
5 353 making it difficult to compare the current study to others. It is important to evaluate the  
6  
7 354 implementation processes in order to truly understand the effectiveness of multifaceted  
8  
9  
10 355 strategies.

11  
12  
13 356 Another interesting thing to note is the fact that the costs for secondary care and alternative  
14  
15 357 care are higher in the intervention group than in the control group. This is in line with a very  
16  
17 358 similar recent implementation study for the management of LBP. In that study, patients in the  
18  
19 359 intervention group had higher LBP-related costs for inpatient secondary care.<sup>[45]</sup> Studies  
20  
21 360 within and outside the field of LBP research have shown similar results, where patients and  
22  
23 361 participants in intervention groups show higher costs due to secondary care and/or alternative  
24  
25 362 care.<sup>[46-50]</sup> The literature does not provide explanations for this fact. One explanation could lie,  
26  
27 363 again, in the low compliance rate of patients in this study.<sup>[20]</sup> On the other hand, the use of  
28  
29 364 alternative care could be seen as self-management, because patients decide what they want,  
30  
31 365 when they want it, and how much they are willing to pay for it. It could very well be that  
32  
33 366 patients try self-management through alternative care for a while, and then get referred to  
34  
35 367 secondary care when and because self-management (through alternative care) did not work  
36  
37 368 for them. It would be interesting to explore the reasons for the higher costs for secondary care  
38  
39 369 further.

40  
41 370 While the strategy evaluated in this study did not yield (cost)effective results, it might still be  
42  
43 371 worthwhile considering the possibilities of eHealth interventions from the perspective of  
44  
45 372 outcomes that were not measured in this study but might have improved, for example actual  
46  
47 373 self-management. A systematic review of randomised controlled trials that have assessed self-  
48  
49 374 management education programmes for osteoarthritis found a mismatch between the aims of  
50  
51 375 such programmes (education and advice about how to self-manage their condition despite  
52  
53 376 their pain and fears) and how the success of the programmes were assessed.<sup>[51]</sup> Many studies



1  
2  
3 377 have measured health-related outcomes such as pain and function but have not specifically  
4  
5 378 determined whether the programmes have improved participants' ability to self-manage.  
6  
7 379 Outcomes such as knowledge about the condition and self-management skills may give more  
8  
9 380 insight into the value of self-management education programmes and should be considered  
10  
11 381 essential to measure in future studies evaluating these types of programmes.<sup>[51]</sup> Looking at the  
12  
13 382 cost savings on absenteeism, presenteeism and unpaid productivity losses in the intervention  
14  
15 383 group compared to the control group, future studies could also benefit from evaluating the  
16  
17 384 effects and cost-effectiveness of eHealth strategies from employer's perspective.  
18  
19  
20  
21

### 22 385 **Study limitations**

23  
24  
25 386 The findings of this study must be interpreted with caution. In this study, the loss-to-follow-  
26  
27 387 up rate was higher for the intervention group (40%) compared to the control group (23%). A  
28  
29 388 possible explanation could be that the strategy provided too much information and  
30  
31 389 participants were contacted too often, making them less willing to comply with completion of  
32  
33 390 the questionnaires over time. The high percentage of loss to follow up may have resulted in a  
34  
35 391 loss of power and in attrition bias. Furthermore the majority of participants did not need or  
36  
37 392 use the intervention, and had minimal disability and impaired quality of life at baseline  
38  
39 393 impacting upon our ability to test the value of our intervention.  
40  
41  
42  
43

### 44 394 **Conclusion**

45  
46  
47 395 Based on this study, a multifaceted eHealth strategy for patients who had presented to primary  
48  
49 396 care (i.e. general practice and physiotherapy) with LBP was not effective or cost-effective in  
50  
51 397 improving back pain beliefs, disability, absenteeism, or quality of life. The multifaceted  
52  
53 398 eHealth strategy should be studied in a different population, i.e. a more mixed group of  
54  
55 399 participants in terms of background (e.g. education, nationality), and participants with LBP  
56  
57 400 and poorer health states at start of the intervention.  
58  
59  
60

1  
2  
3 401 **FIGURE LEGENDS**  
4  
5

6 402 Figure 1. Design of the stepped-wedge cluster randomised controlled trial  
7  
8

9 403 Figure 2. Flow-chart of patient inclusion  
10  
11

12 404 Figure 3. Cost-effectiveness plane for QALYs  
13  
14

15 405 Figure 4. CEAC for QALYs  
16  
17

18  
19 406  
20  
21

22 407  
23  
24  
25  
26  
27  
28  
29  
30  
31  
32  
33  
34  
35  
36  
37  
38  
39  
40  
41  
42  
43  
44  
45  
46  
47  
48  
49  
50  
51  
52  
53  
54  
55  
56  
57  
58  
59  
60

For peer review only

408 **REFERENCES**

- 409 1. Hoy D, Bain C, Williams G, et al. A systematic review of the global prevalence of low  
410 back pain. *Arthritis Rheum* 2012;64(6):2028-37.
- 411 2. GBD 2016 Disease and Injury Incidence and Prevalence Collaborators. Global, regional,  
412 and national incidence, prevalence, and years lived with disability for 328 diseases and  
413 injuries for 195 countries, 1990–2016: a systematic analysis for the Global Burden of  
414 Disease Study 2016. *Lancet* 2017; 390:1211–59.
- 415 3. Hoy D, March L, Brooks P, et al. The global burden of low back pain: estimates from the  
416 Global Burden of Disease 2010 Study. *Ann Rheum Dis* 2014;73:968-974.
- 417 4. Luo X, Pietrobon R, Sun SX, Liu GG, Hey L. Estimates and patterns of direct health care  
418 expenditures among individuals with back pain in the United States. *Spine* 2004;29(1):79–  
419 86.
- 420 5. Maniadakis N, Gray A. The economic burden of back pain in the UK. *Pain* 2000;84:95-  
421 103.2.
- 422 6. Walker BF, Muller R, Grant WD. Low Back Pain in Australian Adults: The Economic  
423 Burden. *Asia Pac J Public Health* 2003;15(2):79-87.
- 424 7. RIVM Kosten van ziekten database 2013. Kosten van zorg voor nek- en rugklachten. (In  
425 English: Cost of care for neck- and back pain). Accessed 26-07-2017 through  
426 [https://www.volksgezondheidenzorg.info/onderwerp/nek-en-  
427 rugklachten/kosten/kosten#node-kosten-van-zorg-voor-nek-en-rugklachten](https://www.volksgezondheidenzorg.info/onderwerp/nek-en-rugklachten/kosten/kosten#node-kosten-van-zorg-voor-nek-en-rugklachten).
- 428 8. Lambeek LC, Van Tulder MW, Swinkels CS, Koppes LLJ, Anema JR, Van Mechelen W.  
429 The Trend in Total Cost of Back Pain in the Netherlands in the Period 2002 to 2007.  
430 *Spine* 2011;36(13):1050-58.

- 1  
2  
3 431 9. Ki Ng S, Cicuttini FM, Wang Y, Wluka AE, Fitzgibbon B, Urquhart DM. Negative  
4  
5 432 beliefs about low back pain are associated with persistent high intensity low back pain.  
6  
7 433 Psychology, Health & Medicine 2017; 22(7):790-799.  
8  
9  
10 434 10. Wertli MM, Rasmussen-Barr E, Weiser S, Bachmann LM, Brunner F. The role of fear  
11  
12 435 avoidance beliefs as a prognostic factor for outcome in patients with nonspecific low back  
13  
14 436 pain: a systematic review. The Spine Journal 2014;14(5):816-836.e4.  
15  
16  
17 437 11. Main CJ, Foster N, Buchbinder R. How important are back pain beliefs and expectations  
18  
19 438 for satisfactory recovery from back pain? Best Practice & Research Clinical  
20  
21 439 Rheumatology 2010; 24(2):205-2017.  
22  
23  
24 440 12. Ferreira ML, Machado G, Latimer J, Maher C, Ferreira PH, Smeets RJ. Factors defining  
25  
26 441 care-seeking in low back pain—a meta-analysis of population based surveys. Eur J Pain  
27  
28 442 2010;14(7):747.e1-7.  
29  
30  
31 443 13. Wong JJ, Côteé P, Sutton DA, et al. Clinical practice guidelines for the noninvasive  
32  
33 444 management of low back pain: A systematic review by the Ontario Protocol for Traffic  
34  
35 445 Injury Management (OPTIMA) Collaboration. Eur J Pain 2016;21:201-216.  
36  
37  
38 446 14. Huber M, Van Vliet M, Giezenberg M, Knottneurs JA. Towards a conceptual framework  
39  
40 447 relating to ‘Health as the ability to adapt and to self-manage’, Operationalisering  
41  
42 448 gezondheidsconcept. Driebergen: Louis Bolk Instituut; 2013.  
43  
44  
45 449 15. Du S, Hu L, Dong J, et al. Self-management program for chronic low back pain: A  
46  
47 450 systematic review and meta-analysis. Patient Education and Counseling 2017;100(1):37-  
48  
49 451 49.  
50  
51  
52 452 16. Elbert NJ, Van Os-Medendorp H, Van Renselaar W, et al. Effectiveness and cost-  
53  
54 453 effectiveness of eHealth interventions in somatic diseases: a systematic review of  
55  
56 454 systematic reviews and meta-analyses. J Med Internet Res 2014; 16(4):e110.  
57  
58  
59  
60

- 1  
2  
3 455 17. McLean S, Chandler D, Nurmatov U, et al. Telehealthcare for asthma. Cochrane Database  
4  
5 456 Syst Rev 2010(10):CD007717.  
6  
7  
8 457 18. Suman A, Schaafsma FG, Elders PJ, van Tulder MW, Anema JR. Cost-effectiveness of a  
9  
10 458 multifaceted implementation strategy for the Dutch multidisciplinary guideline for  
11  
12 459 nonspecific low back pain: design of a stepped-wedge cluster randomised controlled trial.  
13  
14 460 BMC Public Health 2015;15:522; doi: 10.1186/s12889-015-1876-1.  
15  
16  
17 461 19. Buchbinder R, Jolley D, Wyatt M: 2001 Volvo Award Winner in Clinical Studies: Effects  
18  
19 462 of a Media Campaign on Back Pain Beliefs and Its Potential Influence on Management of  
20  
21 463 Low Back Pain in General Practice. Spine. 2001;26(23):2535-2542.  
22  
23  
24 464 20. Suman A, Schaafsma FG, Bamarni J, van Tulder MW, Anema JR. A multimedia  
25  
26 465 campaign to improve back beliefs in patients with non-specific low back pain: a process  
27  
28 466 evaluation. BMC Musculoskelet Disord 2017; 18;18(1):200.  
29  
30  
31 467 21. Suman A, Schaafsma FG, Buchbinder R, van Tulder MW, Anema JR. Implementation of  
32  
33 468 a Multidisciplinary Guideline for Low Back Pain: Process-Evaluation Among Health Care  
34  
35 469 Professionals. J Occup Rehabil 2017; 27(3):422-433.  
36  
37  
38 470 22. Symonds TL, Burton AK, Tillotson KM, Main CJ. Do attitudes and beliefs influence work  
39  
40 471 loss due to low back trouble? Occup Med 1996;46(1):25-32.  
41  
42  
43 472 23. Bostick GP, Schopflocher D, Gross DP. Validity evidence for the back beliefs  
44  
45 473 questionnaire in the general population. Eur J Pain 2013;17(7):10745-  
46  
47 474 81;doi:10.1002/j.1532-2149.2012.00275.x.  
48  
49 475 24. Roland M, Fairbank J. The Roland-Morris Disability Questionnaire and the Oswestry  
50  
51 476 Disability Questionnaire. SPINE 2000;25(24):3115-3124.  
52  
53  
54 477 25. Brooks, R. EuroQol: The current state of play. Health Policy 1996;37:53–72.  
55  
56  
57  
58  
59  
60

- 1  
2  
3 478 26. Koopmanschap MA. PRODISQ: a modular questionnaire on productivity and disease for  
4  
5 479 economic evaluation studies. *Expert Review of Pharmacoeconomics & Outcomes*  
6  
7 480 *Research* 2005;5(1).  
8  
9  
10 481 27. Bouwmans C, De Jong K, Timman R, et al. Feasibility, reliability and validity of a  
11  
12 482 questionnaire on healthcare consumption and productivity loss in patients with a  
13  
14 483 psychiatric disorder (TiC-P). *BMC Health Services Research*.  
15  
16 484 2013;13:217;doi:10.1186/1472-6963-13-217.  
17  
18  
19 485 28. Lamers LM, McDonnell J, Krabbe PFM, van Busschbach JJ. Kwaliteit van leven in  
20  
21 486 economische evaluaties: het Nederlands EQ-5D tarief. *Ned Tijdschr Geneeskd*  
22  
23 487 2005;149:1574-78.  
24  
25  
26 488 29. Zorginstituut Nederland. Richtlijn voor het uitvoeren van economische evaluaties in de  
27  
28 489 gezondheidszorg. Diemen: Zorginstituut; 2016  
29  
30  
31 490 30. Z-Index. G-standard. The Hague: Z-Index BV; 2009.  
32  
33 491 31. Groenwold R, Donders AR, Roes K, Harrell F, Moons K. Dealing with missing outcome  
34  
35 492 data in randomized trials and observational studies. *Am J Epidemiol* 2012;175:210-7.  
36  
37  
38 493 32. Sterne JA, White IR, Carlin JB, et al. Multiple imputation for missing data in  
39  
40 494 epidemiological and clinical research: potentiation and pitfalls. *BMJ* 2009;338:b2393.  
41  
42 495 33. Twisk JWR. *Applied multilevel analysis: a practical guide for medical researchers*.  
43  
44 496 Cambridge: Cambridge University Press; 2006.  
45  
46  
47 497 34. White IR, Royston P, Wood AM. Multiple imputation using chained equations: issues and  
48  
49 498 guidance for practice. *Stat Med* 2011;30:377-99.  
50  
51 499 35. Rubin D. *Multiple imputation for nonresponse in surveys*. Hoboken, New Jersey: John  
52  
53 500 Wiley & Sons; 2004.  
54  
55  
56 501 36. Willian A, Briggs A, Hock J. Regression methods for covariate adjustment and subgroup  
57  
58 502 analysis for non-censored cost-effectiveness data. *Health Economics* 2004;13:461-75.  
59  
60

- 1  
2  
3 503 37. Black W. The CE plane: a graphic representation of cost-effectiveness. *Med Dec Making*  
4  
5 504 1990;10:212-14.  
6  
7  
8 505 38. Fenwick E, O'Brien B, Briggs A. Cost-effectiveness acceptability curves – facts, fallacies  
9  
10 506 and frequently asked questions. *Health Economics* 2004;13:405-15.  
11  
12 507 39. Buchbinder R, Jolley D, Wyatt M. Population based intervention to change back pain  
13  
14 508 beliefs and disability: three part evaluation. *BMJ* 2001;322(7301):1516-1520.  
15  
16  
17 509 40. Teixeira LF, Pereira LS, Silva SL, Dias JM, Dias RC. Factors associated with attitudes  
18  
19 510 and beliefs of elders with acute low back pain: data from the study Back Complaints in the  
20  
21 511 Elders (BACE). *Braz J Phys Ther* 2016;20(6):553-560;doi:10.1590/bjpt-rbf.2014.0188.  
22  
23  
24 512 41. National Institute for HealthCare Excellence (NICE). 2016. Low back pain and sciatica in  
25  
26 513 over 16s: assessment and management. NICE guideline [NG59]. Accessed 19-01-2018  
27  
28 514 through <https://www.nice.org.uk/guidance/ng59>.  
29  
30  
31 515 42. Oliveira VC, Ferreira PH, Maher CG, Pinto RZ, Refshauge KM, Ferreira ML.  
32  
33 516 Effectiveness of self-management of low back pain: systematic review with meta-analysis.  
34  
35 517 *Arthritis Care & Research* 2012;64(11):1739-1748.  
36  
37  
38 518 43. Nicholl BI, Sandal LF, Stochkendahl MJ, et al. Digital support interventions for the self-  
39  
40 519 management of low back pain: a systematic review. *Journal of Medical Internet Research*  
41  
42 520 2017;19(5):e179.  
43  
44  
45 521 44. Suman A, Dikkers MF, Schaafsma FG, Van Tulder MW, Anema JR.. Effectiveness of  
46  
47 522 multifaceted implementation strategies for the implementation of back and neck pain  
48  
49 523 guidelines in health care: a systematic review. *Implementation Science*  
50  
51 524 2016;11:126;doi:10.1186/s13012-016-0482-7.  
52  
53  
54 525 45. Jensen CE, Riis A, Petersen KD, Jensen MB, Pedersen KM. Economic evaluation of an  
55  
56 526 implementation strategy for the management of low back pain in general practice. *Pain*  
57  
58 527 2017;158(5):891-899.  
59  
60

- 1  
2  
3 528 46. Lammerts L, Van Dongen JM, Schaafsma FG, Van Mechelen W, Anema JR. A  
4  
5 529 participatory supportive return to work program for workers without an employment  
6  
7 530 contract, sick-listed due to a common mental disorder: an economic evaluation alongside a  
8  
9 531 randomized controlled trial. *BMC Public Health* 2017;17:162;doi:10.1186/s12889-017-  
10  
11 532 4079-0.  
12  
13  
14 533 47. Noben C, Vilsteren MV, Boot C, et al. Economic evaluation of an intervention program  
15  
16 534 with the aim to improve at-work productivity for workers with rheumatoid arthritis. *J*  
17  
18 535 *Occup Health* 2017;59(3):267-279.  
19  
20  
21 536 48. Van der Meer EW, Van Dongen JM, Boot CR, Van der Gulden JW, Bosmans JE, Anema  
22  
23 537 JR. Economic evaluation of a multifaceted implementation strategy for the prevention of  
24  
25 538 hand eczema among healthcare workers in comparison with a control group: the Hands4U  
26  
27 539 study. *Acta Derm Venereol* 2016;96(4):499-504.  
28  
29  
30 540 49. Van Oostrom SH, Heymans MW, De Vet HCW, Van Tulder MW, Van Mechelen M,  
31  
32 541 Anema JR. Economic evaluation of a workplace intervention for sick-listed employees  
33  
34 542 with distress. *Occupational and Environmental Medicine* 2010;67:603-610.  
35  
36  
37 543 50. Van der Roer N, Van Tulder M, Van Mechelen W, De Vet H. Economic evaluation of an  
38  
39 544 intensive group training protocol compared with usual care physiotherapy in patients with  
40  
41 545 chronic low back pain. *Spine* 2008;33(4):445-51.  
42  
43  
44 546 51. Kroon FP, Van der Burg LR, Buchbinder R, Osborne RH, Johnston RV, Pitt V. Self-  
45  
46 547 management education programmes for osteoarthritis. *Cochrane Database Syst Rev*  
47  
48 548 2014;15(1): CD008963.  
49  
50  
51  
52  
53  
54  
55  
56  
57  
58  
59  
60



|           | T0      | T1           | T2           | T3           | T4           |
|-----------|---------|--------------|--------------|--------------|--------------|
| Cluster 1 | Control | Intervention | Intervention | Intervention | Intervention |
| Cluster 2 | Control | Control      | Intervention | Intervention | Intervention |
| Cluster 3 | Control | Control      | Control      | Intervention | Intervention |
| Cluster 4 | Control | Control      | Control      | Control      | Intervention |

Figure 1. Design of the stepped-wedge cluster randomised controlled trial

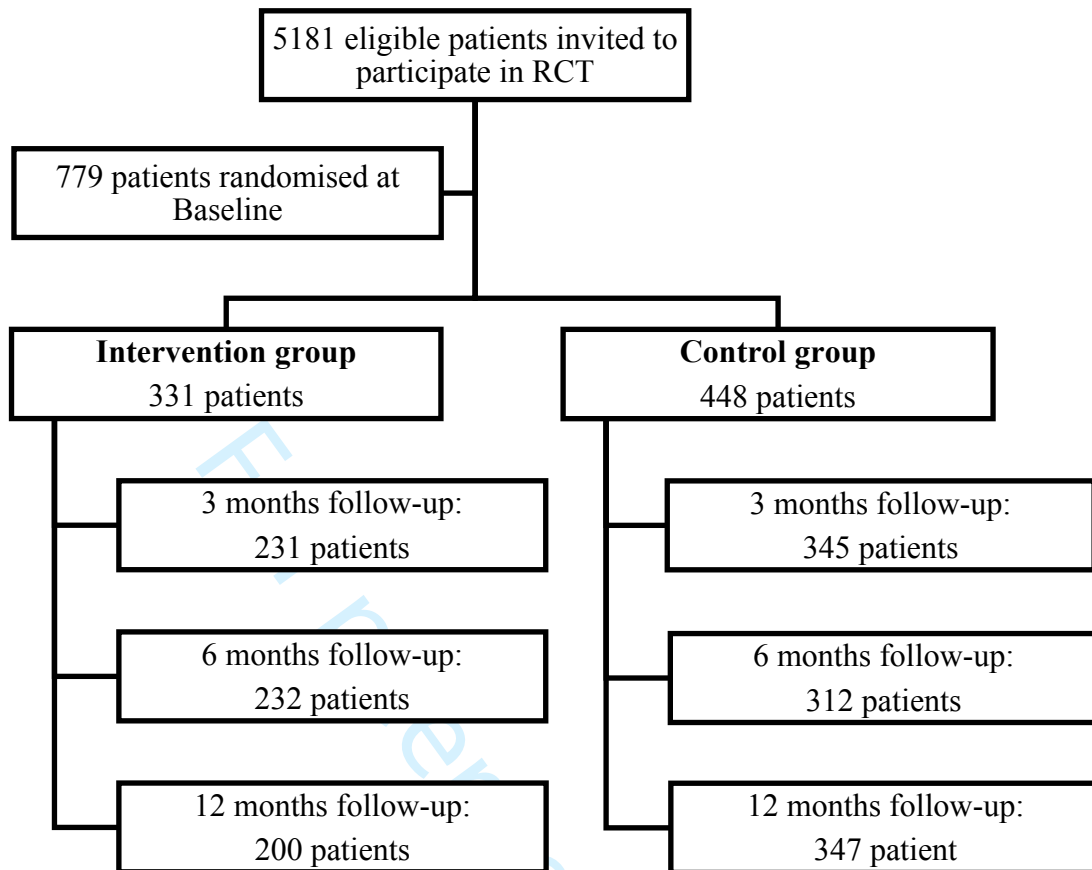

Figure 2. Flow-chart of patient inclusion

Figure 3. Cost-effectiveness plane for QALYs

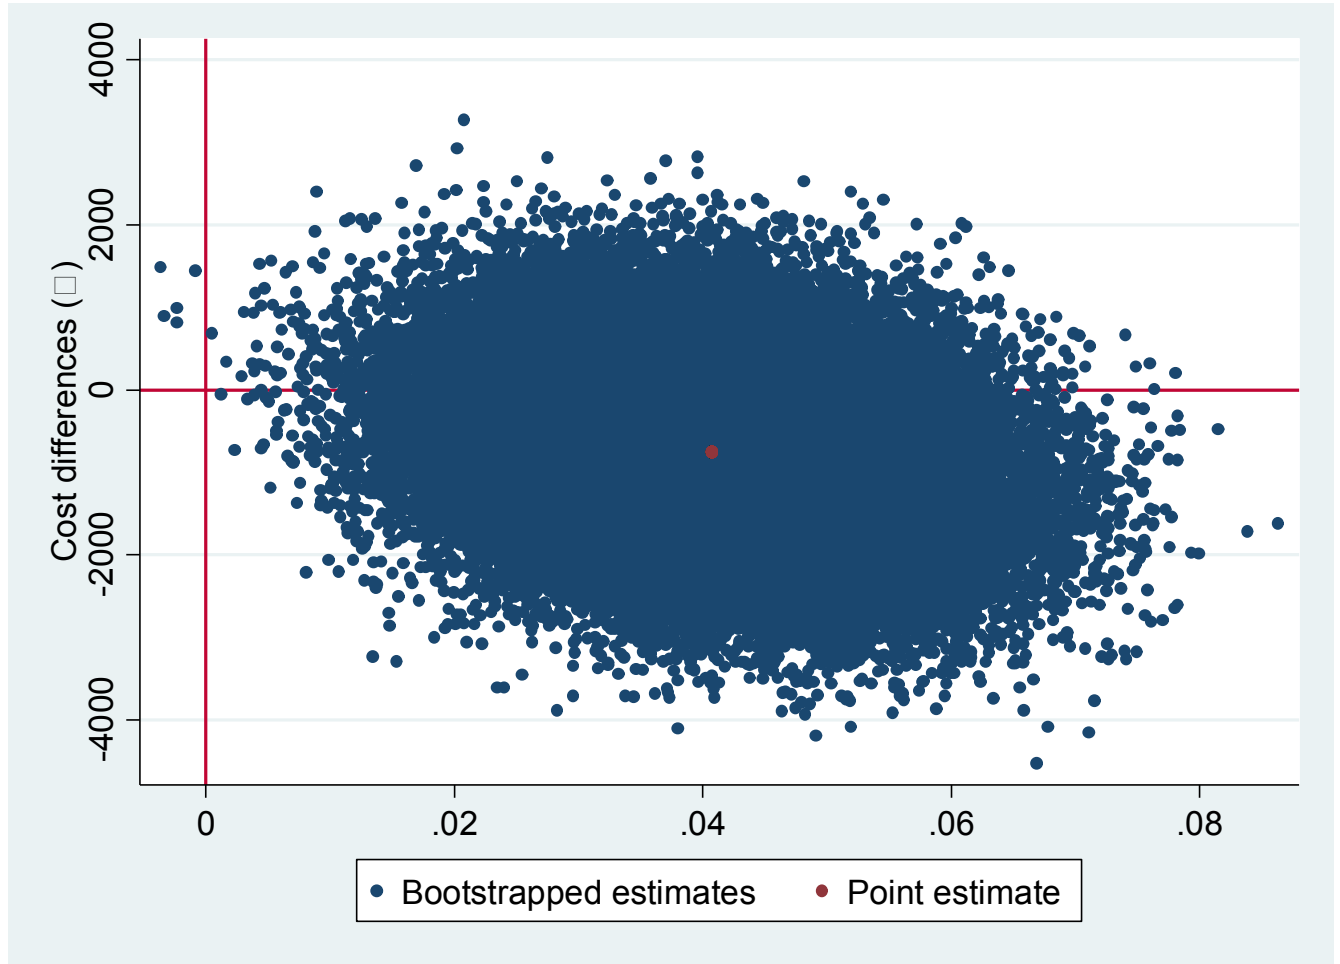

Figure 4. CEAC for QALYs

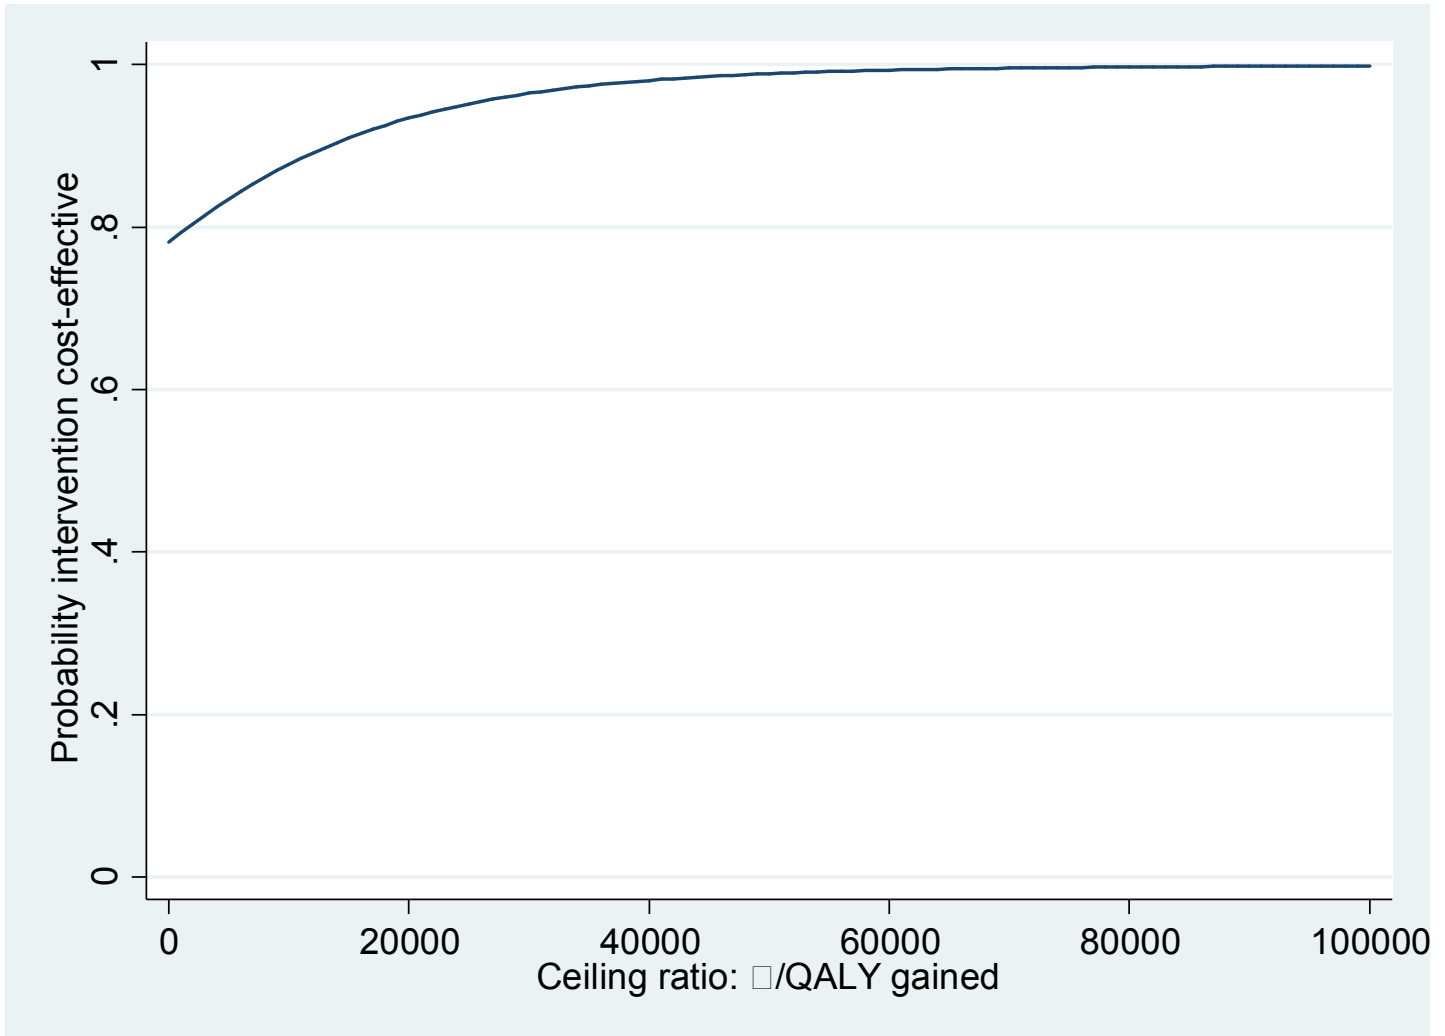

**Table 1: CONSORT 2010 checklist of information to include when reporting a cluster randomised trial**

| Section/Topic                    | Item No | Standard Checklist item                                                                                                                | Extension for cluster designs                                                                   | Page No * |
|----------------------------------|---------|----------------------------------------------------------------------------------------------------------------------------------------|-------------------------------------------------------------------------------------------------|-----------|
| <b>Title and abstract</b>        |         |                                                                                                                                        |                                                                                                 |           |
|                                  | 1a      | Identification as a randomised trial in the title                                                                                      | Identification as a cluster randomised trial in the title                                       | 1         |
|                                  | 1b      | Structured summary of trial design, methods, results, and conclusions (for specific guidance see CONSORT for abstracts) <sup>1,2</sup> | See table 2                                                                                     | 3         |
| <b>Introduction</b>              |         |                                                                                                                                        |                                                                                                 |           |
| <b>Background and objectives</b> | 2a      | Scientific background and explanation of rationale                                                                                     | Rationale for using a cluster design                                                            | 5-6       |
|                                  | 2b      | Specific objectives or hypotheses                                                                                                      | Whether objectives pertain to the cluster level, the individual participant level or both       | 6         |
| <b>Methods</b>                   |         |                                                                                                                                        |                                                                                                 |           |
| <b>Trial design</b>              | 3a      | Description of trial design (such as parallel, factorial) including allocation ratio                                                   | Definition of cluster and description of how the design features apply to the clusters          | 7         |
|                                  | 3b      | Important changes to methods after trial commencement (such as eligibility criteria), with reasons                                     |                                                                                                 | N/A       |
| <b>Participants</b>              | 4a      | Eligibility criteria for participants                                                                                                  | Eligibility criteria for clusters                                                               | 7         |
|                                  | 4b      | Settings and locations where the data were collected                                                                                   |                                                                                                 | 7         |
| <b>Interventions</b>             | 5       | The interventions for each group with sufficient details to allow replication, including how and when they were actually administered  | Whether interventions pertain to the cluster level, the individual participant level or both    | 8-9       |
| <b>Outcomes</b>                  | 6a      | Completely defined pre-specified primary and secondary outcome measures, including how and                                             | Whether outcome measures pertain to the cluster level, the individual participant level or both | 9-11      |

|                                         |     |                                                                                                                                                                                             |                                                                                                                                                                                                                         |     |
|-----------------------------------------|-----|---------------------------------------------------------------------------------------------------------------------------------------------------------------------------------------------|-------------------------------------------------------------------------------------------------------------------------------------------------------------------------------------------------------------------------|-----|
|                                         |     | when they were assessed                                                                                                                                                                     |                                                                                                                                                                                                                         |     |
|                                         | 6b  | Any changes to trial outcomes after the trial commenced, with reasons                                                                                                                       |                                                                                                                                                                                                                         | N/A |
| <b>Sample size</b>                      | 7a  | How sample size was determined                                                                                                                                                              | Method of calculation, number of clusters(s) (and whether equal or unequal cluster sizes are assumed), cluster size, a coefficient of intracluster correlation (ICC or <i>k</i> ), and an indication of its uncertainty | 10  |
|                                         | 7b  | When applicable, explanation of any interim analyses and stopping guidelines                                                                                                                |                                                                                                                                                                                                                         | N/A |
| <b>Randomisation:</b>                   |     |                                                                                                                                                                                             |                                                                                                                                                                                                                         |     |
| <b>Sequence generation</b>              | 8a  | Method used to generate the random allocation sequence                                                                                                                                      |                                                                                                                                                                                                                         | 8   |
|                                         | 8b  | Type of randomisation; details of any restriction (such as blocking and block size)                                                                                                         | Details of stratification or matching if used                                                                                                                                                                           | 8   |
| <b>Allocation concealment mechanism</b> | 9   | Mechanism used to implement the random allocation sequence (such as sequentially numbered containers), describing any steps taken to conceal the sequence until interventions were assigned | Specification that allocation was based on clusters rather than individuals and whether allocation concealment (if any) was at the cluster level, the individual participant level or both                              | 8   |
| <b>Implementation</b>                   | 10  | Who generated the random allocation sequence, who enrolled participants, and who assigned participants to interventions                                                                     | Replace by 10a, 10b and 10c                                                                                                                                                                                             | N/A |
|                                         | 10a |                                                                                                                                                                                             | Who generated the random allocation sequence, who enrolled clusters, and who assigned clusters to interventions                                                                                                         | 8   |
|                                         | 10b |                                                                                                                                                                                             | Mechanism by which individual participants were included in clusters for the purposes of the trial (such as complete                                                                                                    | 8   |

|                                                             |     |                                                                                                                                                |                                                                                                                                                                     |       |
|-------------------------------------------------------------|-----|------------------------------------------------------------------------------------------------------------------------------------------------|---------------------------------------------------------------------------------------------------------------------------------------------------------------------|-------|
|                                                             |     | enumeration, random sampling)                                                                                                                  |                                                                                                                                                                     |       |
|                                                             | 10c |                                                                                                                                                | From whom consent was sought (representatives of the cluster, or individual cluster members, or both), and whether consent was sought before or after randomisation | 8     |
| <b>Blinding</b>                                             | 11a | If done, who was blinded after assignment to interventions (for example, participants, care providers, those assessing outcomes) and how       |                                                                                                                                                                     | N/A   |
|                                                             | 11b | If relevant, description of the similarity of interventions                                                                                    |                                                                                                                                                                     | N/A   |
| <b>Statistical methods</b>                                  | 12a | Statistical methods used to compare groups for primary and secondary outcomes                                                                  | How clustering was taken into account                                                                                                                               | 11-12 |
|                                                             | 12b | Methods for additional analyses, such as subgroup analyses and adjusted analyses                                                               |                                                                                                                                                                     | 11-12 |
| <b>Results</b>                                              |     |                                                                                                                                                |                                                                                                                                                                     |       |
| <b>Participant flow (a diagram is strongly recommended)</b> | 13a | For each group, the numbers of participants who were randomly assigned, received intended treatment, and were analysed for the primary outcome | For each group, the numbers of clusters that were randomly assigned, received intended treatment, and were analysed for the primary outcome                         | 13-14 |
|                                                             | 13b | For each group, losses and exclusions after randomisation, together with reasons                                                               | For each group, losses and exclusions for both clusters and individual cluster members                                                                              | 13-19 |
| <b>Recruitment</b>                                          | 14a | Dates defining the periods of recruitment and follow-up                                                                                        |                                                                                                                                                                     | 13    |
|                                                             | 14b | Why the trial ended or was stopped                                                                                                             |                                                                                                                                                                     | N/A   |
| <b>Baseline data</b>                                        | 15  | A table showing baseline demographic and clinical                                                                                              | Baseline characteristics for the individual and cluster levels as                                                                                                   | 15-17 |

|                                |     |                                                                                                                                                   |                                                                                                                                            |       |
|--------------------------------|-----|---------------------------------------------------------------------------------------------------------------------------------------------------|--------------------------------------------------------------------------------------------------------------------------------------------|-------|
|                                |     | characteristics for each group                                                                                                                    | applicable for each group                                                                                                                  |       |
| <b>Numbers analysed</b>        | 16  | For each group, number of participants (denominator) included in each analysis and whether the analysis was by original assigned groups           | For each group, number of clusters included in each analysis                                                                               | 15-17 |
| <b>Outcomes and estimation</b> | 17a | For each primary and secondary outcome, results for each group, and the estimated effect size and its precision (such as 95% confidence interval) | Results at the individual or cluster level as applicable and a coefficient of intracluster correlation (ICC or k) for each primary outcome | 15-17 |
|                                | 17b | For binary outcomes, presentation of both absolute and relative effect sizes is recommended                                                       |                                                                                                                                            | 15-17 |
| <b>Ancillary analyses</b>      | 18  | Results of any other analyses performed, including subgroup analyses and adjusted analyses, distinguishing pre-specified from exploratory         |                                                                                                                                            | 17-19 |
| <b>Harms</b>                   | 19  | All important harms or unintended effects in each group (for specific guidance see CONSORT for harms <sup>3</sup> )                               |                                                                                                                                            | N/A   |
| <b>Discussion</b>              |     |                                                                                                                                                   |                                                                                                                                            |       |
| <b>Limitations</b>             | 20  | Trial limitations, addressing sources of potential bias, imprecision, and, if relevant, multiplicity of analyses                                  |                                                                                                                                            | 20-23 |
| <b>Generalisability</b>        | 21  | Generalisability (external validity, applicability) of the trial findings                                                                         | Generalisability to clusters and/or individual participants (as relevant)                                                                  | 20-23 |
| <b>Interpretation</b>          | 22  | Interpretation consistent with results, balancing benefits and harms, and considering other relevant evidence                                     |                                                                                                                                            | 2-23  |
| <b>Other information</b>       |     |                                                                                                                                                   |                                                                                                                                            |       |
| <b>Registration</b>            | 23  | Registration number and                                                                                                                           |                                                                                                                                            | 7     |



|                 |    |                                                                                 |    |
|-----------------|----|---------------------------------------------------------------------------------|----|
|                 |    | name of trial registry                                                          |    |
| <b>Protocol</b> | 24 | Where the full trial protocol can be accessed, if available                     | 7  |
| <b>Funding</b>  | 25 | Sources of funding and other support (such as supply of drugs), role of funders | 25 |

\* Note: page numbers optional depending on journal requirements

For peer review only

**Table 2: Extension of CONSORT for abstracts<sup>1,2</sup> to reports of cluster randomised trials**

| Item                      | Standard Checklist item                                                                                     | Extension for cluster trials                                                                                   |
|---------------------------|-------------------------------------------------------------------------------------------------------------|----------------------------------------------------------------------------------------------------------------|
| <b>Title</b>              | Identification of study as randomised                                                                       | <b>Identification of study as cluster randomised</b>                                                           |
| <b>Trial design</b>       | Description of the trial design (e.g. parallel, cluster, non-inferiority)                                   |                                                                                                                |
| <b>Methods</b>            |                                                                                                             |                                                                                                                |
| <b>Participants</b>       | Eligibility criteria for participants and the settings where the data were collected                        | <b>Eligibility criteria for clusters</b>                                                                       |
| <b>Interventions</b>      | Interventions intended for each group                                                                       |                                                                                                                |
| <b>Objective</b>          | Specific objective or hypothesis                                                                            | <b>Whether objective or hypothesis pertains to the cluster level, the individual participant level or both</b> |
| <b>Outcome</b>            | Clearly defined primary outcome for this report                                                             | <b>Whether the primary outcome pertains to the cluster level, the individual participant level or both</b>     |
| <b>Randomization</b>      | How participants were allocated to interventions                                                            | <b>How clusters were allocated to interventions</b>                                                            |
| <b>Blinding (masking)</b> | Whether or not participants, care givers, and those assessing the outcomes were blinded to group assignment |                                                                                                                |
| <b>Results</b>            |                                                                                                             |                                                                                                                |
| <b>Numbers randomized</b> | Number of participants randomized to each group                                                             | <b>Number of clusters randomized to each group</b>                                                             |
| <b>Recruitment</b>        | Trial status <sup>1</sup>                                                                                   |                                                                                                                |
| <b>Numbers analysed</b>   | Number of participants analysed in each group                                                               | <b>Number of clusters analysed in each group</b>                                                               |
| <b>Outcome</b>            | For the primary outcome, a result for each group and the estimated effect size and its precision            | <b>Results at the cluster or individual participant level as applicable for each primary outcome</b>           |
| <b>Harms</b>              | Important adverse events or side effects                                                                    |                                                                                                                |
| <b>Conclusions</b>        | General interpretation of the results                                                                       |                                                                                                                |
| <b>Trial registration</b> | Registration number and name of trial register                                                              |                                                                                                                |
| <b>Funding</b>            | Source of funding                                                                                           |                                                                                                                |

<sup>1</sup> Relevant to Conference Abstracts

## REFERENCES

---

- 1 Hopewell S, Clarke M, Moher D, Wager E, Middleton P, Altman DG, et al. CONSORT for reporting randomised trials in journal and conference abstracts. *Lancet* 2008, 371:281-283
- 2 Hopewell S, Clarke M, Moher D, Wager E, Middleton P, Altman DG at al (2008) CONSORT for reporting randomized controlled trials in journal and conference abstracts: explanation and elaboration. *PLoS Med* 5(1): e20
- 3 Ioannidis JP, Evans SJ, Gotzsche PC, O'Neill RT, Altman DG, Schulz K, Moher D. Better reporting of harms in randomized trials: an extension of the CONSORT statement. *Ann Intern Med* 2004; 141(10):781-788.

For peer review only

## CHEERS checklist—Items to include when reporting economic evaluations of health interventions

| Section/item                                           | Item No | Recommendation                                                                                                                                                                                                                                                                                                              | Reported on page No/<br>line No |
|--------------------------------------------------------|---------|-----------------------------------------------------------------------------------------------------------------------------------------------------------------------------------------------------------------------------------------------------------------------------------------------------------------------------|---------------------------------|
| <b>Title and abstract</b>                              |         |                                                                                                                                                                                                                                                                                                                             |                                 |
| Title                                                  | 1       | Identify the study as an economic evaluation or use more specific terms such as “cost-effectiveness analysis”, and describe the interventions compared.                                                                                                                                                                     | P. 1                            |
| Abstract                                               | 2       | Provide a structured summary of objectives, perspective, setting, methods (including study design and inputs), results (including base case and uncertainty analyses), and conclusions.                                                                                                                                     | P. 3                            |
| <b>Introduction</b>                                    |         |                                                                                                                                                                                                                                                                                                                             |                                 |
| Background and objectives                              | 3       | Provide an explicit statement of the broader context for the study.                                                                                                                                                                                                                                                         | P. 5 - 6                        |
|                                                        |         | Present the study question and its relevance for health policy or practice decisions.                                                                                                                                                                                                                                       | P. 5 - 6                        |
| <b>Methods</b>                                         |         |                                                                                                                                                                                                                                                                                                                             |                                 |
| Target population and subgroups                        | 4       | Describe characteristics of the base case population and subgroups analysed, including why they were chosen.                                                                                                                                                                                                                | P. 7                            |
| Setting and location                                   | 5       | State relevant aspects of the system(s) in which the decision(s) need(s) to be made.                                                                                                                                                                                                                                        | P. 7                            |
| Study perspective                                      | 6       | Describe the perspective of the study and relate this to the costs being evaluated.                                                                                                                                                                                                                                         | P. 7 - 12                       |
| Comparators                                            | 7       | Describe the interventions or strategies being compared and state why they were chosen.                                                                                                                                                                                                                                     | P. 8 - 9                        |
| Time horizon                                           | 8       | State the time horizon(s) over which costs and consequences are being evaluated and say why appropriate.                                                                                                                                                                                                                    | P. 7 - 12                       |
| Discount rate                                          | 9       | Report the choice of discount rate(s) used for costs and outcomes and say why appropriate.                                                                                                                                                                                                                                  | N/A                             |
| Choice of health outcomes                              | 10      | Describe what outcomes were used as the measure(s) of benefit in the evaluation and their relevance for the type of analysis performed.                                                                                                                                                                                     | P. 9 - 11                       |
| Measurement of effectiveness                           | 11a     | <i>Single study-based estimates:</i> Describe fully the design features of the single effectiveness study and why the single study was a sufficient source of clinical effectiveness data.                                                                                                                                  | P. 9 - 12                       |
|                                                        | 11b     | <i>Synthesis-based estimates:</i> Describe fully the methods used for identification of included studies and synthesis of clinical effectiveness data.                                                                                                                                                                      | N/A                             |
| Measurement and valuation of preference based outcomes | 12      | If applicable, describe the population and methods used to elicit preferences for outcomes.                                                                                                                                                                                                                                 | N/A                             |
| Estimating resources and costs                         | 13a     | <i>Single study-based economic evaluation:</i> Describe approaches used to estimate resource use associated with the alternative interventions. Describe primary or secondary research methods for valuing each resource item in terms of its unit cost. Describe any adjustments made to approximate to opportunity costs. | P. 10 – 12                      |
|                                                        | 13b     | <i>Model-based economic evaluation:</i> Describe approaches and data sources used to estimate                                                                                                                                                                                                                               | N/A                             |

| Section/item                                                         | Item No | Recommendation                                                                                                                                                                                                                                                                                                                                        | Reported on page No/<br>line No |
|----------------------------------------------------------------------|---------|-------------------------------------------------------------------------------------------------------------------------------------------------------------------------------------------------------------------------------------------------------------------------------------------------------------------------------------------------------|---------------------------------|
|                                                                      |         | resource use associated with model health states. Describe primary or secondary research methods for valuing each resource item in terms of its unit cost. Describe any adjustments made to approximate to opportunity costs.                                                                                                                         |                                 |
| Currency, price date, and conversion                                 | 14      | Report the dates of the estimated resource quantities and unit costs. Describe methods for adjusting estimated unit costs to the year of reported costs if necessary. Describe methods for converting costs into a common currency base and the exchange rate.                                                                                        | P. 10 – 12                      |
| Choice of model                                                      | 15      | Describe and give reasons for the specific type of decision-analytical model used. Providing a figure to show model structure is strongly recommended.                                                                                                                                                                                                | P. 10 – 12                      |
| Assumptions                                                          | 16      | Describe all structural or other assumptions underpinning the decision-analytical model.                                                                                                                                                                                                                                                              | P. 10 – 12                      |
| Analytical methods                                                   | 17      | Describe all analytical methods supporting the evaluation. This could include methods for dealing with skewed, missing, or censored data; extrapolation methods; methods for pooling data; approaches to validate or make adjustments (such as half cycle corrections) to a model; and methods for handling population heterogeneity and uncertainty. | P. 11 – 12                      |
| <b>Results</b>                                                       |         |                                                                                                                                                                                                                                                                                                                                                       |                                 |
| Study parameters                                                     | 18      | Report the values, ranges, references, and, if used, probability distributions for all parameters. Report reasons or sources for distributions used to represent uncertainty where appropriate. Providing a table to show the input values is strongly recommended.                                                                                   | P. 17 – 19                      |
| Incremental costs and outcomes                                       | 19      | For each intervention, report mean values for the main categories of estimated costs and outcomes of interest, as well as mean differences between the comparator groups. If applicable, report incremental cost-effectiveness ratios.                                                                                                                | P. 18 – 19                      |
| Characterising uncertainty                                           | 20a     | <i>Single study-based economic evaluation:</i> Describe the effects of sampling uncertainty for the estimated incremental cost and incremental effectiveness parameters, together with the impact of methodological assumptions (such as discount rate, study perspective).                                                                           | P. 18 – 19                      |
|                                                                      | 20b     | <i>Model-based economic evaluation:</i> Describe the effects on the results of uncertainty for all input parameters, and uncertainty related to the structure of the model and assumptions.                                                                                                                                                           | N/A                             |
| Characterising heterogeneity                                         | 21      | If applicable, report differences in costs, outcomes, or cost-effectiveness that can be explained by variations between subgroups of patients with different baseline characteristics or other observed variability in effects that are not reducible by more information.                                                                            | N/A                             |
| <b>Discussion</b>                                                    |         |                                                                                                                                                                                                                                                                                                                                                       |                                 |
| Study findings, limitations, generalisability, and current knowledge | 22      | Summarise key study findings and describe how they support the conclusions reached. Discuss limitations and the generalisability of the findings and how the findings fit with current knowledge.                                                                                                                                                     | P. 20 – 23                      |
| <b>Other</b>                                                         |         |                                                                                                                                                                                                                                                                                                                                                       |                                 |
| Source of funding                                                    | 23      | Describe how the study was funded and the role of                                                                                                                                                                                                                                                                                                     | P. 25                           |

| Section/item          | Item No | Recommendation                                                                                                                                                                                                                                    | Reported on page No/<br>line No |
|-----------------------|---------|---------------------------------------------------------------------------------------------------------------------------------------------------------------------------------------------------------------------------------------------------|---------------------------------|
|                       |         | the funder in the identification, design, conduct, and reporting of the analysis. Describe other non-monetary sources of support.                                                                                                                 |                                 |
| Conflicts of interest | 24      | Describe any potential for conflict of interest of study contributors in accordance with journal policy. In the absence of a journal policy, we recommend authors comply with International Committee of Medical Journal Editors recommendations. | P. 24                           |

For consistency, the CHEERS statement checklist format is based on the format of the CONSORT statement checklist

For peer review only

# BMJ Open

## Effectiveness and cost-utility of a multifaceted eHealth strategy to improve back pain beliefs of patients with nonspecific low back pain: a cluster randomised trial

|                                 |                                                                                                                                                                                                                                                                                                                                                                                                                                          |
|---------------------------------|------------------------------------------------------------------------------------------------------------------------------------------------------------------------------------------------------------------------------------------------------------------------------------------------------------------------------------------------------------------------------------------------------------------------------------------|
| Journal:                        | <i>BMJ Open</i>                                                                                                                                                                                                                                                                                                                                                                                                                          |
| Manuscript ID                   | bmjopen-2019-030879.R1                                                                                                                                                                                                                                                                                                                                                                                                                   |
| Article Type:                   | Original research                                                                                                                                                                                                                                                                                                                                                                                                                        |
| Date Submitted by the Author:   | 24-Oct-2019                                                                                                                                                                                                                                                                                                                                                                                                                              |
| Complete List of Authors:       | Suman, Arnela; Amsterdam UMC - Locatie VUMC; University of Alberta, Faculty of Rehabilitation Medicine, Department of Physical Therapy<br>Schaafsma, F; Amsterdam UMC - Locatie VUMC<br>van Dongen, Johanna M.; Vrije Universiteit Amsterdam<br>Elders, Petra; Amsterdam UMC - Locatie VUMC<br>Buchbinder, Rachelle; Monash University<br>Tulder, Maurits; Vrije Universiteit Amsterdam<br>Anema, Johannes; Amsterdam UMC - Locatie VUMC |
| <b>Primary Subject Heading</b>: | Public health                                                                                                                                                                                                                                                                                                                                                                                                                            |
| Secondary Subject Heading:      | Epidemiology, General practice / Family practice, Health economics                                                                                                                                                                                                                                                                                                                                                                       |
| Keywords:                       | LOW BACK PAIN, RANDOMIZED CONTROLLED TRIAL, E-HEALTH, PUBLIC HEALTH, HEALTH ECONOMICS                                                                                                                                                                                                                                                                                                                                                    |
|                                 |                                                                                                                                                                                                                                                                                                                                                                                                                                          |

SCHOLARONE™  
Manuscripts

1  
2  
3 **1 Effectiveness and cost-utility of a multifaceted eHealth strategy to improve back pain**  
4  
5 **2 beliefs of patients with nonspecific low back pain: a cluster randomised trial**  
6  
7  
8  
9 **3**

10  
11 4 Arnela Suman, Frederieke G. Schaafsma, Johanna M van Dongen, Petra JM Elders, Rachelle  
12  
13 5 Buchbinder, Maurits W van Tulder, Johannes R Anema  
14  
15  
16  
17 **6**

18  
19  
20 7 Arnela Suman, Amsterdam UMC, VU University Amsterdam, department of Public and  
21  
22 8 Occupational Health, Amsterdam Public Health research institute, De Boelelaan 1117, 1081HV  
23  
24 9 Amsterdam, The Netherlands  
25  
26  
27  
28 **10**

29  
30  
31 11 Corresponding author: Frederieke G Schaafsma, Amsterdam UMC, VU University  
32  
33 12 Amsterdam, department of Public and Occupational Health, Amsterdam Public Health research  
34  
35 13 institute, De Boelelaan 1117, 1081HV Amsterdam, The Netherlands; [f.schaafsma@vumc.nl](mailto:f.schaafsma@vumc.nl);  
36  
37 14 0031-20-4445685  
38  
39  
40  
41 **15**

42  
43  
44 16 Johanna M van Dongen, VU University Amsterdam, department of Health Sciences,  
45  
46 17 Amsterdam Public Health research institute, Amsterdam, The Netherlands  
47  
48  
49  
50 **18**

51  
52  
53 19 Petra JM Elders, Amsterdam UMC, VU University Amsterdam, department of General Practice  
54  
55 20 and Elderly Care, Amsterdam Public Health research institute, Amsterdam, The Netherlands  
56  
57  
58  
59  
60



1  
2  
3 21 Rachelle Buchbinder, Monash Department of Clinical Epidemiology, Cabrini Institute and  
4  
5 22 Department of Epidemiology and Preventive Medicine, School of Public Health & Preventive  
6  
7 23 Medicine, Monash University, Victoria, Australia  
8  
9

10  
11 24  
12

13  
14 25 Maurits W van Tulder, VU University Amsterdam, department of Health Sciences Amsterdam  
15  
16 26 Public Health research institute, Amsterdam, The Netherlands  
17  
18

19 27  
20

21  
22 28 Johannes R Anema, Amsterdam UMC, VU University Amsterdam, department of Public and  
23  
24 29 Occupational Health, Amsterdam Public Health research institute, Amsterdam, The  
25  
26 30 Netherlands  
27  
28

29  
30 31  
31

32 32 Word count: 4356  
33  
34  
35  
36  
37  
38  
39  
40  
41  
42  
43  
44  
45  
46  
47  
48  
49  
50  
51  
52  
53  
54  
55  
56  
57  
58  
59  
60

1  
2  
3 **33 ABSTRACT**  
4  
5

6 **34 Objectives** To assess the effectiveness and cost-utility of a multifaceted eHealth strategy  
7  
8  
9 **35** compared to usual care in improving patients' back pain beliefs, and in decreasing disability  
10  
11 **36** and absenteeism.

12  
13  
14 **37 Design** A stepped-wedge cluster randomized trial with parallel economic evaluation.  
15

16  
17 **38 Setting** Dutch primary health care.  
18

19  
20 **39 Participants** Patients diagnosed with nonspecific low back pain by their general practitioner or  
21  
22  
23  
24  
25  
26  
27  
28  
29  
30  
31  
32  
33  
34  
35  
36  
37  
38  
39  
40  
41  
42  
43  
44  
45  
46  
47  
48  
49  
50  
51  
52  
53  
54  
55  
56  
57  
58  
59  
60  
**40** physiotherapist. Patients with serious comorbidities or confirmed pregnancy were excluded.  
**41** 779 patients were randomised into intervention group (n=331, 59% female; 60.4% completed  
**42** study) or control group (n=448, 57% female; 77.5% completed study).

**43 Interventions** The intervention consisted of a multifaceted eHealth strategy that included a  
**44** (mobile) website, digital monthly newsletters, and social media platforms. The website  
**45** provided information about back pain, practical advice (e.g. on self-management), working and  
**46** returning to work with back pain, exercise tips, and short video messages from healthcare  
**47** providers and patients providing information and tips. The control consisted a digital patient  
**48** information letter. Patients and outcome assessors were blinded to group allocation.

**49 Primary and secondary outcome measures** The primary outcome was back pain beliefs.  
**50** Secondary outcome measures were disability and absenteeism, and for the pre-planned  
**51** economic evaluation quality of life and societal costs were measured.

**52 Results** There were no between-group differences in back pain beliefs, disability, or  
**53** absenteeism. Mean intervention costs were € 70,- and the societal cost difference was € 535,-  
**54** in favour of the intervention group, but no significant cost savings were found. The ICER

1  
2  
3 55 indicated that the intervention dominated usual care and the probability of cost-effectiveness  
4  
5 56 was 0.85 on a willingness-to-pay of € 10,000/QALY.  
6  
7

8  
9 57 **Conclusions** A multifaceted eHealth strategy was not effective in improving patients' back pain  
10  
11 58 beliefs or in decreasing disability and absenteeism, but showed promising cost-utility results  
12  
13 59 based on QALYs.  
14  
15

16 60 **Trial registration** Netherlands Trial Register (NTR), number: NTR4329.  
17  
18  
19  
20  
21  
22  
23  
24  
25  
26  
27  
28  
29  
30  
31  
32  
33  
34  
35  
36  
37  
38  
39  
40  
41  
42  
43  
44  
45  
46  
47  
48  
49  
50  
51  
52

### 62 **Strengths and limitations of this study**

- 63 • Robust study design: stepped-wedge cluster randomised controlled trial
- 64 • Comprehensive, multifaceted e-Health strategy for low back pain
- 65 • Effectiveness and cost-utility evaluated
- 66 • High rate of loss to follow-up in intervention group (40%) compared to control group (23%)

### 68 **Funding statement**

69 This study was funded by the Netherlands Organisation for Health Research and Development  
70 (ZonMw), grant number 80-83700-98-133053.  
71  
72

### 72 **Competing Interests**

73 All authors have completed the ICMJE uniform disclosure form at  
74 [www.icmje.org/coi\\_disclosure.pdf](http://www.icmje.org/coi_disclosure.pdf) and declare: no support from any organisation for the  
75 submitted work (other than funding agency); no financial relationships with any organisations  
59  
60

1  
2  
3 76 that might have an interest in the submitted work in the previous three years; no other  
4  
5 77 relationships or activities that could appear to have influenced the submitted work.  
6  
7  
8  
9 78

## 10 11 79 **Authors Statement**

12  
13  
14  
15 80 AS collected, prepared, and analysed data and prepared the manuscript. JMvD assisted in cost-  
16  
17 81 utility analyses, interpreted data, and revised the manuscript. FGS, PJME, RB, MWvT, and  
18  
19 82 JRA were all involved in design of the study, interpretation of data, and revising the manuscript  
20  
21  
22 83 for intellectual content.  
23  
24  
25 84

## 26 27 28 85 **Data sharing**

29  
30  
31 86 Relevant data are available upon reasonable request.  
32  
33  
34 87

## 88 BACKGROUND

89 Low back pain (LBP) is a major medical problem throughout the world. The global 1-month  
90 point prevalence is estimated to be 23.2%.<sup>[1]</sup> LBP is the leading cause of musculoskeletal and  
91 work disability, and years lived with disability (YLDs) worldwide.<sup>[2-3]</sup> Recent estimates from  
92 the Global Burden of Disease Study indicate that LBP accounts for 57 million YLDs, and that  
93 over 250 million people develop LBP annually.<sup>[2]</sup> The economic burden of LBP is high.  
94 Estimates of the annual economic burden of LBP vary from between AU\$9.17 billion in  
95 Australia, £12.3 billion in the UK, and US\$91 billion in the United States.<sup>[4-6]</sup> In the  
96 Netherlands, recent estimates report the costs of LBP to be around €1.3 billion, a quarter of all  
97 healthcare costs due to musculoskeletal disorders.<sup>[7]</sup> However, indirect costs due to absenteeism  
98 and to reduced productivity while at work are not included in this estimate. Previous research  
99 has shown that indirect costs make up 88% of all societal costs due to LBP.<sup>[8]</sup> Since LBP leads  
100 to a high proportion of work absence, the costs of LBP in the Netherlands are much higher than  
101 suggested.<sup>[7]</sup> Besides the burden on society, LBP has a high burden on the lives of individuals.  
102 Over the past decades, several studies have shown that people with negative back pain beliefs  
103 have more pain, disability, negative work-related outcomes (i.e. productivity loss and sickness  
104 absence), and higher health care utilization.<sup>[9-12]</sup>

105 Many guidelines for LBP recommend self-management for patients, which is a reflection of a  
106 newly proposed definition of health, i.e. “health as the ability to adapt and self-manage.”<sup>[13-14]</sup> A  
107 systematic review on the effectiveness of education programmes designed to improve self-  
108 management suggested that these programmes are effective in improving pain intensity and  
109 disability, but did not measure actual self-management.<sup>[15]</sup>

110 Underlined by the high economic, societal, and individual burden of LBP, no highly effective  
111 treatment for LBP has yet been found. However, eHealth, which is the provision of  
112 (personalised) health care at a distance (e.g. through internet and thus digital), has shown

1  
2  
3 113 promise with regards to its' effectiveness and cost-effectiveness in improving outcomes such  
4  
5 114 as patient health, patient satisfaction, self-management and healthcare costs in patients with  
6  
7 115 physical diseases.<sup>[16-17]</sup> Therefore, the current study aimed to assess the effectiveness and cost-  
8  
9 116 utility of a multifaceted eHealth strategy to improve beliefs, knowledge, and self-management  
10  
11 117 of LBP compared to usual care in improving patients' back pain beliefs, and in decreasing their  
12  
13  
14 118 disability and absenteeism.  
15  
16  
17  
18 119

For peer review only

## 120 **METHODS**

### 121 **Study design**

122 This study was part of a cluster-randomised controlled trial with a pre-planned parallel  
123 economic evaluation, that was registered in 2013 with the Netherlands Trial Register (NTR)  
124 under number NTR4329.<sup>[18]</sup> The trial lasted from September 2013 to September 2017, with the  
125 actual intervention being provided between April 2014 and December 2016. The Medical  
126 Ethics Committee of the VU University medical centre assessed this study's design and  
127 procedures, and in accordance with the local regulatory guidelines and standards for human  
128 subjects protection in the Netherlands (Medical Research Involving Human Subjects Act  
129 [WMO], 2005), this study proved to be exempt from further medical ethical review. A detailed  
130 description of the design of this study has been published elsewhere.<sup>[18]</sup> This study is reported  
131 following the Consort statement (Supplementary file 1) and the Cheers statement  
132 (Supplementary file 2).

### 133 **Participants**

134 Twenty-five general practices, 19 physiotherapy practices, and 29 occupational physicians in  
135 the Amsterdam area participated in this study and recruited patients for this trial. Patients were  
136 aged 18-75 years and were diagnosed with nonspecific LBP by their general practitioner (GP)  
137 or physiotherapist (PT), whom they had visited due to back complaints no longer than 3 months  
138 prior to inclusion in the study. Nonspecific LBP was defined as LBP with or without motor  
139 and/or sensory deficits in one or both legs, including sciatica and radiculopathy, that is not  
140 caused by underlying specific pathology (red flags), i.e. a tumour, (osteoporotic) vertebral  
141 fracture, ankylosing spondylitis, and cauda equina syndrome. Exclusion criteria were: serious  
142 comorbidities including Alzheimer's disease, multiple sclerosis, Parkinson's disease,  
143 amyotrophic lateral sclerosis, cerebrovascular accident in the last year, malignancy in the last

1  
2  
3 144 five years, and severe psychiatric disorders, i.e. schizophrenia and bipolar disorder. Patients  
4  
5 145 with confirmed pregnancy in the last year were also excluded. Assessment of exclusion criteria  
6  
7 146 was done electronically using software, as well as manual assessment by the referring general  
8  
9 147 practitioner or physiotherapist.

### 13 148 **Randomisation**

16 149 This study was a stepped-wedge cluster randomised controlled trial. The participating general  
17  
18 150 practices, physiotherapy practices, and occupational physicians were assigned to one of four  
19  
20 151 clusters based on their geographic proximity to each other. The clusters sequentially received a  
21  
22 152 multifaceted continuing medical education training (illustrated by Figure 1). This clustering  
23  
24 153 allowed for minimisation of contamination between the participants. Patients were allocated  
25  
26 154 according to the group their general practitioner, physiotherapist or occupational physician were  
27  
28 155 assigned, i.e., patients registered within a practice that was in the control group at time of  
29  
30 156 enrolment were allocated to the control group for patients, thus randomisation and allocation  
31  
32 157 were performed on cluster level. However, patients were blinded and not aware of group  
33  
34 158 allocation, and thus concealment was on individual level. Randomisation was performed by  
35  
36 159 means of computer-generated allocation, using specific software. An independent research  
37  
38 160 assistant performed the concealed allocation, enrolling of participants, and assignment of  
39  
40 161 participants to groups. Outcome assessors were blinded to individual patient allocation.

### 47 162 **Intervention and control**

50 163 The intervention was provided to patients on an individual level. Patients in the cluster whose  
51  
52 164 GP or PT was randomised into the intervention group received access to a multifaceted eHealth  
53  
54 165 strategy that aimed to reduce patients' negative back pain beliefs and improve their knowledge  
55  
56 166 and self-management of LBP. The campaign included an informative website, digital monthly  
57  
58 167 newsletters, and social media platforms. The website provided comprehensive information  
59  
60



1  
2  
3 168 about LBP, such as practical advice (e.g. on self-management), working and returning to work  
4  
5 169 with LBP, exercise tips, and short video messages. In these videos, actors and healthcare  
6  
7 170 professionals shared their experiences with LBP and provided tips on self-management, coping,  
8  
9 171 and working with LBP. The videos were inspired by the effective Australian mass media  
10  
11 172 campaign ‘Back Pain: Don’t Take It Lying Down’.<sup>[19]</sup> Social media platforms included a forum  
12  
13 173 on the website, and a Facebook page where patients could contact researchers, healthcare  
14  
15 174 providers, and other patients. All parts of the intervention were also available in a mobile  
16  
17 175 version that was adaptive to any electronic device. Patients were required to use pre-set  
18  
19 176 usernames and passwords to enter the intervention website. The patient intervention was  
20  
21 177 supported by continuing medical education for GPs, PTs, and occupational physicians (OPs).  
22  
23 178 More detailed descriptions of the patient and professional based interventions are published  
24  
25 179 elsewhere.<sup>[20-21]</sup> Patients in the control group received a digital patient information letter and  
26  
27 180 had no access to the intervention website, materials or social media platforms. Results of the  
28  
29 181 professional based intervention have been published elsewhere.<sup>[22]</sup>  
30  
31  
32  
33  
34  
35

### 36 182 **Sample size and outcomes**

37  
38  
39 183 The primary outcome measure was back pain beliefs, assessed using the Back Beliefs  
40  
41 184 Questionnaire (BBQ). The BBQ is designed to measure beliefs about the inevitable  
42  
43 185 consequences of LBP (e.g. there is no real treatment for back trouble, back trouble must be  
44  
45 186 rested). It is a validated questionnaire consisting of 14 items, and rates back pain beliefs on a  
46  
47 187 scale of 9 to 45, with higher scores indicating more positive (better) back pain beliefs (e.g.  
48  
49 188 exercising through LBP is good).<sup>[23-24]</sup>  
50  
51  
52  
53

54 189 The sample size calculation was based on a hypothesized 10% improvement in back pain beliefs  
55  
56 190 as measured by the BBQ, based on an observed mean improvement of 9.6% between three  
57  
58 191 successive surveys in the Australian campaign.<sup>[19]</sup> An intra-class correlation coefficient (ICC)  
59  
60

1  
2  
3 192 of 0.05 was applied to adjust for the cluster randomisation design. Assuming a 10%  
4  
5 193 improvement from a mean score of 26.5 (95% Confidence Interval (CI) 26.1-26.8, SD 6) on the  
6  
7 194 BBQ, and applying an ICC of 0.05, the necessary sample size was estimated to be 500 patients.  
8  
9  
10 195 This calculation takes into account a dropout-rate of 20%, power (1-beta) of 0.90 and an alpha  
11  
12 196 of 0.05.

13  
14  
15 197 The secondary outcomes included disability, measured with the Roland Disability  
16  
17 198 Questionnaire (RDQ-24), which has been shown to be a valid and reliable instrument for  
18  
19 199 patients with LBP.<sup>[25]</sup> The RDQ-24 consists of 24 items, rating disability on a scale of 0 to 24,  
20  
21 200 with higher scores indicating more disability. The EQ-5D-3L was used to measure quality of  
22  
23 201 life for the purpose of the economic evaluation.<sup>[26]</sup> Health care use, absenteeism, presenteeism  
24  
25 202 and unpaid productivity losses were measured with the generic PROductivity and DIsease  
26  
27 203 Questionnaire (PRODISQ) and the Trimbos/iMTA questionnaire for Costs associated with  
28  
29 204 Psychiatric Illness (TIC-P).<sup>[27-28]</sup> Resource use data was collected using 3-month recall periods.  
30  
31 205 All outcomes were measured at baseline and after 3, 6, and 12 months follow-up. The study  
32  
33 206 protocol initially included measuring the level of pain using the Pain Coping Inventory (PCI)  
34  
35 207 questionnaire. However, as this questionnaire proved to put an unreasonable (time) burden on  
36  
37 208 the patients, it was no longer used and measured. Instead, having back pain at baseline was  
38  
39 209 measured and reported.

40  
41  
42  
43  
44  
45  
46 210 For the economic evaluation, the scores on the EQ-5D-3L were converted into utility scores  
47  
48 211 using the Dutch tariff.<sup>[29]</sup> These utility scores range from 0 (death) to 1 (maximum health.  
49  
50 212 Quality adjusted life years (QALYs) were calculated using linear interpolation between  
51  
52 213 measurement points.

53  
54  
55  
56 214 Societal costs are the sum of intervention costs, costs for the use of healthcare, and costs for  
57  
58 215 informal care (i.e. care provided by family and other volunteers), work absenteeism,  
59  
60

1  
2  
3 216 presenteeism (i.e. reduced productivity at work), and unpaid productivity losses (i.e. reduced  
4  
5 217 productivity in unpaid activities, such as volunteer work). The intervention costs comprised all  
6  
7 218 costs related to the development and implementation of the intervention (Supplementary file  
8  
9  
10 219 3). Intervention costs were micro-costed, meaning that detailed data were collected on the  
11  
12 220 number of resources consumed as well as their associated unit prices (Supplementary file 4  
13  
14 221 shows unit costs). Information on the costs of materials was collected from a detailed overview  
15  
16 222 of project budget expenditures. The time investments of the intervention providers were costed  
17  
18 223 using estimates of their gross hourly salaries. There were no costs for the intervention for the  
19  
20 224 control group. Healthcare utilization included primary healthcare (e.g. GP, PT), secondary  
21  
22 225 healthcare (e.g. diagnostic imaging, medical specialist), alternative healthcare (e.g. acupuncture  
23  
24 226 or massage), and medication (both prescribed and over-the-counter medication related to LBP).  
25  
26 227 To value healthcare utilization, prices from the Dutch Manual for Costing (DMC) were used.<sup>[30]</sup>  
27  
28 228 Where standard costs were unavailable, prices provided by healthcare professionals'  
29  
30 229 associations were used. Medication use was valued using the prices of the Royal Dutch Society  
31  
32 230 of Pharmacy.<sup>[31]</sup> Informal care was valued using a recommended Dutch shadow price according  
33  
34 231 to the DMC.<sup>[30]</sup> Absenteeism was calculated and valued using patient data collected with the  
35  
36 232 PRODISQ and TIC-P. In accordance with the DMC, patients' daily absenteeism cost was  
37  
38 233 calculated by dividing their self-reported gross annual salary by their total number of workable  
39  
40 234 days per year. Using the Friction Cost Approach (FCA, friction period 23 weeks), absenteeism  
41  
42 235 costs were estimated by multiplying the total number of sick leave days during follow-up by  
43  
44 236 their associated costs. Presenteeism was calculated using patient data collected with the TIC-P,  
45  
46 237 where patients indicated how many days they went to work while having LBP. To obtain  
47  
48 238 workday equivalents lost to presenteeism, this number of days was multiplied by a self-reported  
49  
50 239 inefficiency score ranging between 0 (could not perform any tasks) and 1 (could perform all  
51  
52 240 tasks as efficient as without LBP). Presenteeism costs were subsequently calculated by  
53  
54  
55  
56  
57  
58  
59  
60

1  
2  
3 241 multiplying the total number of presenteeism days by their associated costs. All costs were  
4  
5 242 transformed to 2016 Euros. As follow-up was 12 month, discounting was not necessary.  
6  
7

### 8 243 **Statistical analyses**

9  
10  
11 244 Analyses were performed according to the intention-to-treat principle. Descriptive statistics  
12  
13  
14 245 were used to compare baseline characteristics between intervention and control group  
15  
16 246 participants as well as between participants with complete and incomplete data. Missing values  
17  
18 247 for costs and effects were imputed using Multiple Imputation by Chained Equations, and  
19  
20 248 imputations were performed separately for the intervention and control group.<sup>[32-33]</sup> Variables  
21  
22 249 associated with the “missingness” of data, outcomes and potential confounders were included  
23  
24 250 in the imputation model. Cost and effect measure values were imputed per time point, costs  
25  
26 251 were imputed at the cost category level and effects were imputed at the outcome level. Using  
27  
28 252 predictive mean matching, a total of 10 complete data sets were generated in order for the loss  
29  
30 253 of efficiency to be below 5% and pooled estimated were calculated according to Rubin’s  
31  
32 254 rules.<sup>[32-35]</sup> Effectiveness analyses were performed using maximum likelihood estimation  
33  
34 255 longitudinal mixed-effects models with multilevel structure to account for clustering effects,  
35  
36 256 and ‘missing at random’ assumptions.<sup>[36]</sup> Analyses of effect and cost data were performed in  
37  
38 257 Stata 14, and the statistical significance level was set at  $p < 0.05$ . Regression coefficients or odds  
39  
40 258 ratios (ORs) were calculated with 95%-confidence intervals (CIs).  
41  
42  
43  
44  
45  
46

47 259 A cost-utility analysis (CUA) was performed from a societal perspective. Imputation models  
48  
49 260 included intervention costs, age, gender, educational level, nationality, being employed,  
50  
51 261 performing physically demanding work, physical activity (minutes per week), and available  
52  
53 262 cost and effect measure values. Cost and effect difference estimates between intervention and  
54  
55 263 control group were analysed using seemingly unrelated regression (SUR), while simultaneously  
56  
57 264 adjusting for the possible correlation between costs and effects.<sup>[37]</sup> Incremental cost-  
58  
59  
60

1  
2  
3 265 effectiveness ratios (ICERs) were calculated by dividing the adjusted mean cost differences by  
4  
5 266 those in effects. Uncertainty surrounding the cost differences and ICERs was estimated using  
6  
7 267 Bias Corrected and Accelerated bootstrapping (BCA) with 5000 replications, and presented by  
8  
9 268 95%-CIs and plotted on cost-effectiveness planes.<sup>[38]</sup> Cost-effectiveness acceptability curves  
10  
11 269 (CEACs) presented the probability of the intervention being cost-effectiveness at different  
12  
13 270 values of willingness to pay.<sup>[39]</sup> A sensitivity analysis was performed, in which only patients  
14  
15 271 with complete data on all measurement points were included.  
16  
17  
18  
19

## 20 272 **Patient involvement**

21  
22  
23 273 The Dutch patient association for spinal disorders (“NVV De Wervelkolom”) was involved in  
24  
25 274 the design of this study and provided advice about the content of the intervention.  
26  
27  
28  
29

30 275  
31  
32  
33  
34  
35  
36  
37  
38  
39  
40  
41  
42  
43  
44  
45  
46  
47  
48  
49  
50  
51  
52  
53  
54  
55  
56  
57  
58  
59  
60

## 276 **RESULTS**

### 277 **Participants**

278 In total, 5181 eligible patients were invited to participate in this study. Of these patients, 779  
279 (response rate of 15%) agreed to participate and were randomised to the intervention (n=331)  
280 and control (n=448) groups (Figure 2). Follow-up responses in the intervention group were  
281 69.8% at 3 months follow-up, 70.1% at 6 months follow-up, and 60.4% at 12 months follow-  
282 up. The follow-up responses in the control group were higher than in the intervention group at  
283 3 months follow-up (77%) and 12 months follow-up (77.5%). At 6 months follow-up the  
284 responses in the control group were similar to those in the intervention group (69.6%).

285 At baseline, characteristics of patients in the intervention group were similar to those in the  
286 control group. Table 1 shows that a high percentage of participants were female, 60%  
287 (intervention group) and 57% (control group) had a high educational level, and over half of the  
288 participants were employed. They performed about 3 hours of physical activity per week. Table  
289 1 also shows the baseline scores on the BBQ, RDQ-24, and absenteeism for both groups. At  
290 baseline, there was a lower absenteeism rate in the intervention group compared to the control  
291 group.

292 Table 1. Baseline characteristics of patients

|                                                                                                                                      | <b>Intervention (n=331)</b> | <b>Control (n=448)</b> |
|--------------------------------------------------------------------------------------------------------------------------------------|-----------------------------|------------------------|
| <b>Mean age (SD*)</b>                                                                                                                | 55.7 (13.9) (n=320)         | 56.6 (14.6) (n=439)    |
| <b>Female gender (%)</b>                                                                                                             | 188 (59) (n=320)            | 252 (57) (n=439)       |
| <b>Back pain at baseline (%)</b>                                                                                                     | 201 (63) (n=320)            | 275 (63) (n=439)       |
| <b>Nationality (%)</b>                                                                                                               | (n=320)                     | (n=439)                |
| - Dutch                                                                                                                              | 298 (93)                    | 409 (93)               |
| - Western countries immigrant                                                                                                        | 16 (5)                      | 23 (5)                 |
| - Non-western countries immigrant                                                                                                    | 6 (2)                       | 7 (2)                  |
| <b>Educational level (%)</b>                                                                                                         | (n=320)                     | (n=439)                |
| - None (never attended school):                                                                                                      | 9 (3)                       | 12 (3)                 |
| - Lower (primary school)                                                                                                             | 25 (8)                      | 42 (10)                |
| - Vocational (college)                                                                                                               | 92 (29)                     | 134 (30)               |
| - Higher (university and university of applied sciences)                                                                             | 194 (60)                    | 251 (57)               |
| <b>Mean activity minutes/week (SD)</b>                                                                                               | 161 (109) (n=196)           | 166 (104) (n=254)      |
| <b>Employed (paid work) (%)</b>                                                                                                      | 183 (57) (n=320)            | 232 (53) (n=439)       |
| <b>Physically demanding work (%)</b>                                                                                                 | 88 (28) (n=320)             | 121 (28) (n=439)       |
| <b>Mean back pain beliefs score (SD)</b><br>(measured by BBQ, range 9-45; higher score means more positive back pain beliefs)        | 24.7 (6.0) (n=295)          | 24.8 (6.2) (n=394)     |
| <b>Mean disability score (SD)</b><br>(measured by RDQ-24, range 0-24; higher score means more disability)                            | 5.1 (4.7) (n=317)           | 5.9 (5.3) (n=434)      |
| <b>Mean absenteeism days (SD)</b> (self-reported number of days over past three months)                                              | 2.2 (7.0) (n=187)           | 4.0 (13.2) (n=246)     |
| <b>Mean quality of life score (SD)</b><br>(utility score measured by EQ-5D; range 0 to 1; higher score means better quality of life) | 0.79 (0.22) (n=331)         | 0.75 (0.25) (n=448)    |

1  
2  
3  
4  
5  
6  
7  
8  
9  
10  
11  
12  
13  
14  
15  
16  
17  
18  
19  
20  
21  
22  
23  
24  
25  
26  
27  
28  
29  
30  
31  
32  
33  
34  
35  
36  
37  
38  
39  
40  
41  
42  
43  
44  
45  
46

293

294 \* SD: Standard Deviation

For peer review only



295 **Intention-to-treat effectiveness analysis**

296 Table 2 shows the mean scores on the BBQ, RDQ-24, absenteeism, and quality of life of the  
 297 intervention group compared to the control group. Table 3 shows the results of the intention-  
 298 to-treat analysis. There were no significant differences in back pain beliefs, disability and  
 299 absenteeism between groups at any time point. The interaction term with gender was significant  
 300 for disability, showing that the effect for males was larger than that for females.

301

302 *Table 2. Mean scores (SD) on BBQ, RDQ-24, EQ-5D and absenteeism*

|                           | <b>Mean (SD) back pain beliefs</b><br><i>(measured by BBQ, range 9-45; higher score means more positive back pain beliefs)</i> |                           |                            |
|---------------------------|--------------------------------------------------------------------------------------------------------------------------------|---------------------------|----------------------------|
|                           | <b>3 months follow-up</b>                                                                                                      | <b>6 months follow-up</b> | <b>12 months follow-up</b> |
| <b>Intervention group</b> | 24.4 (5.8)                                                                                                                     | 24.0 (5.9)                | 24.1 (5.8)                 |
| <b>Control group</b>      | 24.9 (6.2)                                                                                                                     | 24.6 (6.0)                | 24.1 (6.3)                 |
|                           | <b>Mean (SD) disability</b><br><i>(measured by RDQ-24, range 0-24; higher score means more disability)</i>                     |                           |                            |
|                           | <b>3 months follow-up</b>                                                                                                      | <b>6 months follow-up</b> | <b>12 months follow-up</b> |
| <b>Intervention group</b> | 4.4 (4.7)                                                                                                                      | 3.9 (4.3)                 | 3.9 (4.3)                  |
| <b>Control group</b>      | 5.2 (5.1)                                                                                                                      | 4.8 (4.8)                 | 4.5 (4.7)                  |
|                           | <b>Mean (SD) absenteeism</b><br><i>(self-reported number of days over past three months)</i>                                   |                           |                            |
|                           | <b>3 months follow-up</b>                                                                                                      | <b>6 months follow-up</b> | <b>12 months follow-up</b> |
| <b>Intervention group</b> | 1.2 (6.5)                                                                                                                      | 0.9 (4.8)                 | 0.7 (2.7)                  |

|                           |                                                                                                                                       |                           |                            |
|---------------------------|---------------------------------------------------------------------------------------------------------------------------------------|---------------------------|----------------------------|
| <b>Control group</b>      | 2.6 (9.8)                                                                                                                             | 0.7 (4.1)                 | 0.7 (4.4)                  |
|                           | <b>Mean (SD) quality of life</b><br><i>(utility score measured by EQ-5D; range 0 to 1; higher score means better quality of life)</i> |                           |                            |
|                           | <b>3 months follow-up</b>                                                                                                             | <b>6 months follow-up</b> | <b>12 months follow-up</b> |
| <b>Intervention group</b> | 0,857 (0,209)                                                                                                                         | 0,904 (0,163)             | 0,914 (0,152)              |
| <b>Control group</b>      | 0,824 (0,236)                                                                                                                         | 0,857 (0,214)             | 0,866 (0,191)              |

303 Table 3. Adjusted effects of the intervention based on intention-to-treat analyses

| Outcome                              |        | Difference between intervention and control | 95%-CI     |
|--------------------------------------|--------|---------------------------------------------|------------|
| <b>Back pain beliefs<sup>1</sup></b> |        | -0.13                                       | -0.90;0.65 |
| <b>Disability</b>                    | Male   | -1.13                                       | 0.93;1.37  |
|                                      | Female | -0.79                                       | 0.68;0.93  |
| <b>Absenteeism<sup>2;3</sup></b>     |        | -0.94                                       | 0.69;1.29  |

304 1: Adjusted for educational level, physical activity, having back pain at baseline, being employed, comorbidity;

305 2: Adjusted for age, physical activity, having back pain at baseline; 3: Only for participants who were employed at  
306 baseline (intervention group n=183; control group n=232)

307

308

### 309 Cost-utility analysis

310 Intervention costs per patient were € 70. Direct costs for primary care and medication were  
311 lower in the intervention than in the control group, while direct costs for secondary and  
312 alternative care were higher in the intervention than in the control group. Indirect costs due to  
313 absenteeism, presenteeism, and unpaid productivity loss were lower in the intervention than in  
314 the control group. The crude total cost differences were not significant (Table 4).

315

316 *Table 4. Crude costs per cost category in euros (€)*

| Cost category               | Mean costs (SEM*) in € |            | Cost difference (95%-CI) in € |
|-----------------------------|------------------------|------------|-------------------------------|
|                             | Intervention           | Control    |                               |
| <b>Direct costs</b>         |                        |            |                               |
| Primary care                | 340 (26)               | 405 (26)   | -65 (-134;-2)                 |
| Secondary care              | 478 (228)              | 229 (42)   | 249 (58;515)                  |
| Alternative care            | 742 (218)              | 322 (55)   | 421 (182;722)                 |
| Medication                  | 29 (7)                 | 44 (9)     | -15 (-45;-0.70)               |
| Intervention                | 70                     | 0          | 70 (N/A)                      |
| <b>Indirect costs</b>       |                        |            |                               |
| Absenteeism                 | 1034 (242)             | 1547 (235) | -513 (-941;-77)               |
| Presenteeism                | 5735 (681)             | 6342 (537) | -607 (-2076;-831)             |
| Unpaid productivity         | 4000 (887)             | 5047 (616) | -1047 (-1954;-203)            |
| <b>Total societal costs</b> | 8444 (820)             | 8979 (619) | -535 (-2230;1172)             |

317 \* SEM: Standard Error of the Mean

318 During the 12-month follow-up, intervention and control group participants gained 0.881  
319 (SEM=0.008) and 0.837 (SEM=0.008) QALYs, respectively. There was a statistically  
320 significant difference in QALYs (adjusted for age, gender, educational level, nationality,  
321 employment, and physically demanding work, and baseline utility value) over the 12-month  
322 follow-up period between the control and intervention group (adjusted effect difference 0.03;  
323 95%-CI 0.001;0.042). The intervention did not yield significant cost savings (adjusted for age,  
324 gender, educational level, nationality, employment, and physically demanding work cost

1  
2  
3 325 difference € -748 per patient; 95%-CI € -2341;878). The ICER for QALYs indicated that the  
4  
5 326 intervention dominated usual care. The majority (79%) of incremental cost-effectiveness pairs  
6  
7 327 was located in the southeast quadrant of the cost-effectiveness plane (Figure 3), indicating that  
8  
9 328 the intervention was on average more effective and less costly. Figure 4 shows that the  
10  
11 329 intervention has probability of 0.85 of being cost-effective on a willingness-to-pay of €10.000  
12  
13 330 per QALY gained, increasing to a probability of 1.00 on a willingness-to-pay of € 80.000 per  
14  
15 331 QALY gained. Results of the sensitivity analysis differed extensively from those of the main  
16  
17 332 analysis (adjusted cost difference € 1780 per patient; 95%-CI € -1298 to 6945; adjusted effect  
18  
19 333 difference -0.002; 95%-CI -0.079 to 0.075), suggesting that the “missingness” of data is likely  
20  
21  
22  
23 334 related to various observed factors.  
24  
25  
26  
27 335

## DISCUSSION

This study evaluated the effectiveness and cost-utility of a multifaceted eHealth strategy compared to usual care in improving patients' back pain beliefs, and in decreasing their disability and absenteeism. The study results show that the campaign was not effective on these outcomes. The probability of cost-effectiveness was high: 0.85 per QALY gained at a willingness-to-pay threshold of € 10.000, and increased to a maximum probability of 1 per QALY gained at a willingness-to-pay threshold of € 80.000.

A possible explanation for the lack of effectiveness might be that in this study, almost 40% of participants did not have back pain anymore at the start of the actual intervention (i.e. baseline moment). Patients who had visited their general practitioner or physiotherapist no longer than 3 months prior to recruitment could participate in this study. As a consequence, some patients may have agreed to participate while they had already recovered from their LBP at the start of the intervention. With the recruitment protocol used it was not possible to select only the chronic LBP cases. Therefore, the intervention may no longer have been necessary for the participants that did not have LBP at the start of the intervention, and for them effectiveness was not to be expected. The back pain beliefs of the study population were quite low at baseline compared to those of the Australian mass media campaign by which the current study was inspired.<sup>[40]</sup> Mean BBQ scores in the Australian study were 26.5 at the start of the campaign and increased significantly to 29.7, while in the current study the BBQ scores were 24.7 and 24.8 in the intervention and control groups, respectively. This indicates that there was room for improvement in back pain beliefs in the current study.<sup>[40]</sup> Another study that assessed factors that were associated with beliefs and attitudes of elderly (mean age 69) also found low back pain beliefs scores (mean 23.7).<sup>[41]</sup> In the current study disability scores measured with the RDQ-24 showed low levels of disability, and absenteeism rates were also low. Quality of life scores were relatively high and similar between groups with no further improvement over time.

1  
2  
3 361 It is arguable that the participating patients were in good health states from the start and gaining  
4  
5 362 much improvement on these functional outcomes was not realistic. Process evaluations among  
6  
7 363 participating patients and professionals alongside the present study showed that compliance  
8  
9  
10 364 with the intervention was very low.<sup>[20-21]</sup> Most patients did not comply to the full e-health  
11  
12 365 intervention: 31% of the participants had not used the campaign materials at all, and 42.9% had  
13  
14 366 only used it once, and professionals almost never discussed the intervention with their patients.  
15  
16 367 Probably most participants did not need the intervention to improve their functional ability, but  
17  
18 368 improvement in back pain beliefs could have been possible had the compliance rates in this  
19  
20 369 study been higher.<sup>[20-21]</sup>  
21  
22  
23  
24 370 Self-management is recommended for the management of LBP, and healthcare professionals  
25  
26 371 are advised to provide advice and information, tailored to needs and capabilities, to help patients  
27  
28 372 self-manage their LBP.<sup>[42]</sup> One possible way to help patients self-manage their LBP is through  
29  
30 373 an eHealth strategy, but evidence regarding the most effective content and mode of delivery for  
31  
32 374 self-management options is lacking.<sup>[43]</sup> eHealth is easy to deliver, safe, and usually inexpensive  
33  
34 375 (e.g. in the current study, the intervention costs were less than € 70 per patient), a recent  
35  
36 376 systematic review on digital support intervention for LBP could not find significant beneficial  
37  
38 377 effects of digital self-management interventions.<sup>[44]</sup> However, most of the participants in the  
39  
40 378 included studies were Caucasian, highly educated, middle-aged females, meaning that the  
41  
42 379 findings of the current study are comparable to similar studies. The results of the current study  
43  
44 380 are in line with other studies that have attempted to improve patient outcomes and costs in LBP  
45  
46 381 by using multifaceted strategies. A systematic review of the effectiveness of multifaceted  
47  
48 382 strategies for guideline implementation in LBP and neck pain did not find that multifaceted  
49  
50 383 strategies changed patient outcomes or costs of care.<sup>[45]</sup> However, the majority of the studies  
51  
52 384 included in the review did not provide insight into the implementation process, raising the  
53  
54 385 question whether the lack of effectiveness is caused by the failure of the theory (multifaceted  
55  
56  
57  
58  
59  
60

1  
2  
3 386 strategy) or by failure of the implementation process, making it difficult to compare the current  
4  
5 387 study to others. It is important to evaluate the implementation processes in order to truly  
6  
7  
8 388 understand the effectiveness of multifaceted strategies.  
9

10  
11 389 Another interesting thing to note is the fact that the costs for secondary care and alternative care  
12  
13 390 are higher in the intervention group than in the control group. This is in contrast with a very  
14  
15 391 similar recent implementation study for the management of LBP. In that study, patients in the  
16  
17 392 intervention group had higher LBP-related costs for primary care, but lower LBP-related costs  
18  
19 393 for secondary care.<sup>[46]</sup> Other studies within and outside the field of LBP however have shown  
20  
21 394 similar results to the current study, where patients and participants in intervention groups show  
22  
23 395 higher total medical care costs due to secondary care and/or alternative care.<sup>[47-51]</sup> The literature  
24  
25 396 does not provide explanations for this fact. One explanation could lie, again, in the low  
26  
27 397 compliance rate of patients in this study.<sup>[20]</sup> On the other hand, the use of alternative care could  
28  
29 398 be seen as self-management, because patients decide what they want, when they want it, and  
30  
31 399 how much they are willing to pay for it. It could very well be that patients try self-management  
32  
33 400 through alternative care for a while, and then get referred to secondary care when and because  
34  
35 401 self-management (through alternative care) did not work for them. It would be interesting to  
36  
37 402 explore the reasons for the higher costs for secondary care further.  
38  
39  
40  
41  
42  
43

44 403 While the strategy evaluated in this study did not yield effective results, it might still be  
45  
46 404 worthwhile considering the possibilities of eHealth interventions from the perspective of  
47  
48 405 outcomes that were not measured in this study but might have improved, for example actual  
49  
50 406 self-management. A systematic review of randomised controlled trials that have assessed self-  
51  
52 407 management education programmes for osteoarthritis found a mismatch between the aims of  
53  
54 408 such programmes (education and advice about how to self-manage their condition despite their  
55  
56 409 pain and fears) and how the success of the programmes were assessed.<sup>[52]</sup> Many studies have  
57  
58 410 measured health-related outcomes such as pain and function but have not specifically  
59  
60

1  
2  
3 411 determined whether the programmes have improved participants' ability to self-manage.  
4  
5 412 Outcomes such as knowledge about the condition and self-management skills may give more  
6  
7 413 insight into the value of self-management education programmes and should be considered  
8  
9 414 essential to measure in future studies evaluating these types of programmes.<sup>[52]</sup> Looking at the  
10  
11 415 cost savings on absenteeism, presenteeism and unpaid productivity losses in the intervention  
12  
13 416 group compared to the control group, future studies could also benefit from evaluating the  
14  
15 417 effects and cost-effectiveness of eHealth strategies from employer's perspective.  
16  
17  
18  
19

### 20 418 **Study limitations**

21  
22  
23 419 The findings of this study must be interpreted with caution. In this study, the loss-to-follow-up  
24  
25 420 rate was higher for the intervention group (40%) compared to the control group (23%). A  
26  
27 421 possible explanation could be that the strategy provided too much information and participants  
28  
29 422 were contacted too often, making them less willing to comply with completion of the  
30  
31 423 questionnaires over time. A comparison between patients that completed the study and patients  
32  
33 424 that were lost to follow-up showed that, in both the intervention and the control group, patients  
34  
35 425 that completed the study were more likely to have a high educational background. Additionally,  
36  
37 426 in the intervention group, patients that completed the study were more likely to not be employed  
38  
39 427 (i.e. involved in paid work) than patients that were lost to follow-up. The high percentage of  
40  
41 428 loss to follow-up may have resulted in a loss of power and in attrition bias. Additionally, it  
42  
43 429 underlines the need to take educational backgrounds and daily activities of participants into  
44  
45 430 account in designing studies and interventions. Furthermore, the majority of participants did  
46  
47 431 not need or use the intervention, and had minimal disability and impaired quality of life at  
48  
49 432 baseline impacting upon our ability to test the value of our intervention. Unfortunately, the  
50  
51 433 eHealth strategy is no longer accessible, which makes repeating of this study difficult. As the  
52  
53 434 strategy was financed through the funding for the trial, no financial resources were available to  
54  
55 435 keep the eHealth strategy functioning after the trial ended and funding stopped. Materials and  
56  
57  
58  
59  
60



1  
2  
3 436 screenshots are still available for future use. Lastly, as for the lack of significant cost differences  
4  
5 437 in light of the cost-utility analysis, it is known that cost data are highly skewed and therefore  
6  
7 438 require large sample sizes to detect statistically significant differences.<sup>[53]</sup> In this study, the  
8  
9 439 sample size calculation was based on back pain beliefs, which may have underpowered it to  
10  
11 440 detect significant cost differences.  
12  
13  
14

## 15 441 **Conclusion**

16  
17  
18 442 Based on this study, a multifaceted eHealth strategy for patients who had presented to primary  
19  
20 443 care (i.e. general practice and physiotherapy) with LBP was not effective in improving back  
21  
22 444 pain beliefs, disability, or absenteeism. However, the cost-utility analysis based on QALYs  
23  
24 445 showed promising results. The multifaceted eHealth strategy should be studied in a different  
25  
26 446 population, i.e. a more mixed group of participants in terms of background (e.g. education,  
27  
28 447 nationality), and participants with LBP and poorer health states at start of the intervention.  
29  
30  
31  
32

33 448

## 34 35 36 449 **FIGURE LEGENDS**

37  
38  
39 450 Figure 1. Design of the stepped-wedge cluster randomised controlled trial

40  
41  
42 451 Figure 2. Flow-chart of patient inclusion

43  
44  
45 452 Figure 3. Cost-effectiveness plane for QALYs

46  
47  
48 453 Figure 4. CEAC for QALYs

49  
50  
51  
52 454

53  
54  
55 455  
56  
57  
58  
59  
60

456 **REFERENCES**

- 457 1. Hoy D, Bain C, Williams G, et al. A systematic review of the global prevalence of low back  
458 pain. *Arthritis Rheum* 2012;64(6):2028-37.
- 459 2. GBD 2016 Disease and Injury Incidence and Prevalence Collaborators. Global, regional,  
460 and national incidence, prevalence, and years lived with disability for 328 diseases and  
461 injuries for 195 countries, 1990–2016: a systematic analysis for the Global Burden of  
462 Disease Study 2016. *Lancet* 2017; 390:1211–59.
- 463 3. Hoy D, March L, Brooks P, et al. The global burden of low back pain: estimates from the  
464 Global Burden of Disease 2010 Study. *Ann Rheum Dis* 2014;73:968-974.
- 465 4. Luo X, Pietrobon R, Sun SX, Liu GG, Hey L. Estimates and patterns of direct health care  
466 expenditures among individuals with back pain in the United States. *Spine* 2004;29(1):79–  
467 86.
- 468 5. Maniadakis N, Gray A. The economic burden of back pain in the UK. *Pain* 2000;84:95-  
469 103.2.
- 470 6. Walker BF, Muller R, Grant WD. Low Back Pain in Australian Adults: The Economic  
471 Burden. *Asia Pac J Public Health* 2003;15(2):79-87.
- 472 7. RIVM Kosten van ziekten database 2013. Kosten van zorg voor nek- en rugklachten. (In  
473 English: Cost of care for neck- and back pain). Accessed 26-07-2017 through  
474 [https://www.volksgezondheidenzorg.info/onderwerp/nek-en-  
475 rugklachten/kosten/kosten#node-kosten-van-zorg-voor-nek-en-rugklachten](https://www.volksgezondheidenzorg.info/onderwerp/nek-en-rugklachten/kosten/kosten#node-kosten-van-zorg-voor-nek-en-rugklachten).
- 476 8. Lambeek LC, Van Tulder MW, Swinkels CS, Koppes LLJ, Anema JR, Van Mechelen W.  
477 The Trend in Total Cost of Back Pain in the Netherlands in the Period 2002 to 2007. *Spine*  
478 2011;36(13):1050-58.

- 1  
2  
3 479 9. Ki Ng S, Cicuttini FM, Wang Y, Wluka AE, Fitzgibbon B, Urquhart DM. Negative beliefs  
4  
5 480 about low back pain are associated with persistent high intensity low back pain. *Psychology,*  
6  
7 481 *Health & Medicine* 2017; 22(7):790-799.
- 8  
9  
10 482 10. Wertli MM, Rasmussen-Barr E, Weiser S, Bachmann LM, Brunner F. The role of fear  
11  
12 483 avoidance beliefs as a prognostic factor for outcome in patients with nonspecific low back  
13  
14 484 pain: a systematic review. *The Spine Journal* 2014;14(5):816-836.e4.
- 15  
16  
17 485 11. Main CJ, Foster N, Buchbinder R. How important are back pain beliefs and expectations  
18  
19 486 for satisfactory recovery from back pain? *Best Practice & Research Clinical Rheumatology*  
20  
21 487 2010; 24(2):205-2017.
- 22  
23  
24 488 12. Ferreira ML, Machado G, Latimer J, Maher C, Ferreira PH, Smeets RJ. Factors defining  
25  
26 489 care-seeking in low back pain—a meta-analysis of population based surveys. *Eur J Pain*  
27  
28 490 2010;14(7):747.e1-7.
- 29  
30  
31 491 13. Wong JJ, Côté P, Sutton DA, et al. Clinical practice guidelines for the noninvasive  
32  
33 492 management of low back pain: A systematic review by the Ontario Protocol for Traffic  
34  
35 493 Injury Management (OPTIMA) Collaboration. *Eur J Pain* 2016;21:201-216.
- 36  
37  
38 494 14. Huber M, Van Vliet M, Giezenberg M, Knottneurs JA. Towards a conceptual framework  
39  
40 495 relating to ‘Health as the ability to adapt and to self-manage’, Operationalisering  
41  
42 496 gezondheidsconcept. Driebergen: Louis Bolk Instituut; 2013.
- 43  
44  
45 497 15. Du S, Hu L, Dong J, et al. Self-management program for chronic low back pain: A  
46  
47 498 systematic review and meta-analysis. *Patient Education and Counseling* 2017;100(1):37-  
48  
49 499 49.
- 50  
51  
52 500 16. Elbert NJ, Van Os-Medendorp H, Van Renselaar W, et al. Effectiveness and cost-  
53  
54 501 effectiveness of eHealth interventions in somatic diseases: a systematic review of  
55  
56 502 systematic reviews and meta-analyses. *J Med Internet Res* 2014; 16(4):e110.

- 1  
2  
3 503 17. McLean S, Chandler D, Nurmatov U, et al. Telehealthcare for asthma. Cochrane Database  
4  
5 504 Syst Rev 2010(10):CD007717.  
6  
7  
8 505 18. Suman A, Schaafsma FG, Elders PJ, van Tulder MW, Anema JR. Cost-effectiveness of a  
9  
10 506 multifaceted implementation strategy for the Dutch multidisciplinary guideline for  
11  
12 507 nonspecific low back pain: design of a stepped-wedge cluster randomised controlled trial.  
13  
14 508 BMC Public Health 2015;15:522; doi: 10.1186/s12889-015-1876-1.  
15  
16  
17 509 19. Buchbinder R, Jolley D, Wyatt M: 2001 Volvo Award Winner in Clinical Studies: Effects  
18  
19 510 of a Media Campaign on Back Pain Beliefs and Its Potential Influence on Management of  
20  
21 511 Low Back Pain in General Practice. Spine. 2001;26(23):2535-2542.  
22  
23  
24 512 20. Suman A, Schaafsma FG, Bamarni J, van Tulder MW, Anema JR. A multimedia campaign  
25  
26 513 to improve back beliefs in patients with non-specific low back pain: a process evaluation.  
27  
28 514 BMC Musculoskelet Disord 2017; 18;18(1):200.  
29  
30  
31 515 21. Suman A, Schaafsma FG, Buchbinder R, van Tulder MW, Anema JR. Implementation of a  
32  
33 516 Multidisciplinary Guideline for Low Back Pain: Process-Evaluation Among Health Care  
34  
35 517 Professionals. J Occup Rehabil 2017; 27(3):422-433.  
36  
37  
38 518 22. Suman A, Schaafsma FG, Van de Ven PM, et al. Effectiveness of a multifaceted  
39  
40 519 implementation strategy compared to usual care on low back pain guideline adherence  
41  
42 520 among general practitioners. BMC Health Serv Res 2019; 18(1):358.  
43  
44 521  
45  
46  
47 522 23. Symonds TL, Burton AK, Tillotson KM, Main CJ. Do attitudes and beliefs influence work  
48  
49 523 loss due to low back trouble? Occup Med 1996;46(1):25-32.  
50  
51  
52 524 24. Bostick GP, Schopflocher D, Gross DP. Validity evidence for the back beliefs questionnaire  
53  
54 525 in the general population. Eur J Pain 2013;17(7):10745-81;doi:10.1002/j.1532-  
55  
56 526 2149.2012.00275.x.  
57  
58  
59  
60

- 1  
2  
3 527 25. Roland M, Fairbank J. The Roland-Morris Disability Questionnaire and the Oswestry  
4  
5 528 Disability Questionnaire. *SPINE* 2000;25(24):3115-3124.  
6  
7  
8 529 26. Brooks, R. EuroQol: The current state of play. *Health Policy* 1996;37:53–72.  
9  
10 530 27. Koopmanschap MA. PRODISQ: a modular questionnaire on productivity and disease for  
11  
12 531 economic evaluation studies. *Expert Review of Pharmacoeconomics & Outcomes Research*  
13  
14 532 2005;5(1).  
15  
16  
17 533 28. Bouwmans C, De Jong K, Timman R, et al. Feasibility, reliability and validity of a  
18  
19 534 questionnaire on healthcare consumption and productivity loss in patients with a psychiatric  
20  
21 535 disorder (TiC-P). *BMC Health Services Research*. 2013;13:217;doi:10.1186/1472-6963-  
22  
23 536 13-217.  
24  
25  
26 537 29. Lamers LM, McDonnell J, Krabbe PFM, van Busschbach JJ. Kwaliteit van leven in  
27  
28 538 economische evaluaties: het Nederlands EQ-5D tarief. *Ned Tijdschr Geneeskd*  
29  
30 539 2005;149:1574-78.  
31  
32  
33 540 30. Zorginstituut Nederland. Richtlijn voor het uitvoeren van economische evaluaties in de  
34  
35 541 gezondheidszorg. Diemen: Zorginstituut; 2016  
36  
37  
38 542 31. Z-Index. G-standard. The Hague: Z-Index BV; 2009.  
39  
40 543 32. Groenwold R, Donders AR, Roes K, Harrell F, Moons K. Dealing with missing outcome  
41  
42 544 data in randomized trials and observational studies. *Am J Epidemiol* 2012;175:210-7.  
43  
44  
45 545 33. Sterne JA, White IR, Carlin JB, et al. Multiple imputation for missing data in  
46  
47 546 epidemiological and clinical research: potentiation and pitfalls. *BMJ* 2009;338:b2393.  
48  
49 547 34. White IR, Royston P, Wood AM. Multiple imputation using chained equations: issues and  
50  
51 548 guidance for practice. *Stat Med* 2011;30:377-99.  
52  
53  
54 549 35. Rubin D. Multiple imputation for nonresponse in surveys. Hoboken, New Jersey: John  
55  
56 550 Wiley & Sons; 2004.  
57  
58  
59  
60

- 1  
2  
3 551 36. Twisk JWR. Applied multilevel analysis: a practical guide for medical researchers.  
4  
5 552 Cambridge: Cambridge University Press; 2006.  
6  
7  
8 553  
9  
10 554 37. Willian A, Briggs A, Hock J. Regression methods for covariate adjustment and subgroup  
11  
12 555 analysis for non-censored cost-effectiveness data. Health Economics 2004;13:461-75.  
13  
14 556 38. Black W. The CE plane: a graphic representation of cost-effectiveness. Med Dec Making  
15  
16 557 1990;10:212-14.  
17  
18  
19 558 39. Fenwick E, O'Brien B, Briggs A. Cost-effectiveness acceptability curves – facts, fallacies  
20  
21 559 and frequently asked questions. Health Economics 2004;13:405-15.  
22  
23  
24 560 40. Buchbinder R, Jolley D, Wyatt M. Population based intervention to change back pain beliefs  
25  
26 561 and disability: three part evaluation. BMJ 2001;322(7301):1516-1520.  
27  
28  
29 562 41. Teixeira LF, Pereira LS, Silva SL, Dias JM, Dias RC. Factors associated with attitudes and  
30  
31 563 beliefs of elders with acute low back pain: data from the study Back Complaints in the  
32  
33 564 Elders (BACE). Braz J Phys Ther 2016;20(6):553-560;doi:10.1590/bjpt-rbf.2014.0188.  
34  
35  
36 565 42. National Institute for HealthCare Excellence (NICE). 2016. Low back pain and sciatica in  
37  
38 566 over 16s: assessment and management. NICE guideline [NG59]. Accessed 19-01-2018  
39  
40 567 through <https://www.nice.org.uk/guidance/ng59>.  
41  
42  
43 568 43. Oliveira VC, Ferreira PH, Maher CG, Pinto RZ, Refshauge KM, Ferreira ML. Effectiveness  
44  
45 569 of self-management of low back pain: systematic review with meta-analysis. Arthritis Care  
46  
47 570 & Research 2012;64(11):1739-1748.  
48  
49  
50 571 44. Nicholl BI, Sandal LF, Stochkendahl MJ, et al. Digital support interventions for the self-  
51  
52 572 management of low back pain: a systematic review. Journal of Medical Internet Research  
53  
54 573 2017;19(5):e179.  
55  
56  
57 574 45. Suman A, Dikkers MF, Schaafsma FG, Van Tulder MW, Anema JR.. Effectiveness of  
58  
59 575 multifaceted implementation strategies for the implementation of back and neck pain  
60

- 1  
2  
3 576 guidelines in health care: a systematic review. *Implementation Science*  
4  
5 577 2016;11:126;doi:10.1186/s13012-016-0482-7.  
6  
7  
8 578 46. Jensen CE, Riis A, Petersen KD, Jensen MB, Pedersen KM. Economic evaluation of an  
9  
10 579 implementation strategy for the management of low back pain in general practice. *Pain*  
11  
12 580 2017;158(5):891-899.  
13  
14  
15 581 47. Lammerts L, Van Dongen JM, Schaafsma FG, Van Mechelen W, Anema JR. A  
16  
17 582 participatory supportive return to work program for workers without an employment  
18  
19 583 contract, sick-listed due to a common mental disorder: an economic evaluation alongside a  
20  
21 584 randomized controlled trial. *BMC Public Health* 2017;17:162;doi:10.1186/s12889-017-  
22  
23 585 4079-0.  
24  
25  
26 586 48. Noben C, Vilsteren MV, Boot C, et al. Economic evaluation of an intervention program  
27  
28 587 with the aim to improve at-work productivity for workers with rheumatoid arthritis. *J Occup*  
29  
30 588 *Health* 2017;59(3):267-279.  
31  
32  
33 589 49. Van der Meer EW, Van Dongen JM, Boot CR, Van der Gulden JW, Bosmans JE, Anema  
34  
35 590 JR. Economic evaluation of a multifaceted implementation strategy for the prevention of  
36  
37 591 hand eczema among healthcare workers in comparison with a control group: the Hands4U  
38  
39 592 study. *Acta Derm Venereol* 2016;96(4):499-504.  
40  
41  
42 593 50. Van Oostrom SH, Heymans MW, De Vet HCW, Van Tulder MW, Van Mechelen M,  
43  
44 594 Anema JR. Economic evaluation of a workplace intervention for sick-listed employees with  
45  
46 595 distress. *Occupational and Environmental Medicine* 2010;67:603-610.  
47  
48  
49 596 51. Van der Roer N, Van Tulder M, Van Mechelen W, De Vet H. Economic evaluation of an  
50  
51 597 intensive group training protocol compared with usual care physiotherapy in patients with  
52  
53 598 chronic low back pain. *Spine* 2008;33(4):445-51.  
54  
55  
56  
57  
58  
59  
60

- 1  
2  
3 599 52. Kroon FP, Van der Burg LR, Buchbinder R, Osborne RH, Johnston RV, Pitt V. Self-  
4  
5 600 management education programmes for osteoarthritis. Cochrane Database Syst Rev  
6  
7 601 2014;15(1): CD008963.  
8  
9  
10 602 53. Briggs A. Economic evaluation and clinical trials: size matters. BMJ 2000;321:1362–1363.  
11  
12  
13  
14  
15  
16  
17  
18  
19  
20  
21  
22  
23  
24  
25  
26  
27  
28  
29  
30  
31  
32  
33  
34  
35  
36  
37  
38  
39  
40  
41  
42  
43  
44  
45  
46  
47  
48  
49  
50  
51  
52  
53  
54  
55  
56  
57  
58  
59  
60

For peer review only



|           | T0 (Baseline) | T1 (3 months) | T2 (6 months) | T3 (9 months) | T4 (12 months) |
|-----------|---------------|---------------|---------------|---------------|----------------|
| Cluster 1 | Control       | Intervention  | Intervention  | Intervention  | Intervention   |
| Cluster 2 | Control       | Control       | Intervention  | Intervention  | Intervention   |
| Cluster 3 | Control       | Control       | Control       | Intervention  | Intervention   |
| Cluster 4 | Control       | Control       | Control       | Control       | Intervention   |

Figure 1. Design of the stepped-wedge cluster randomised controlled trial

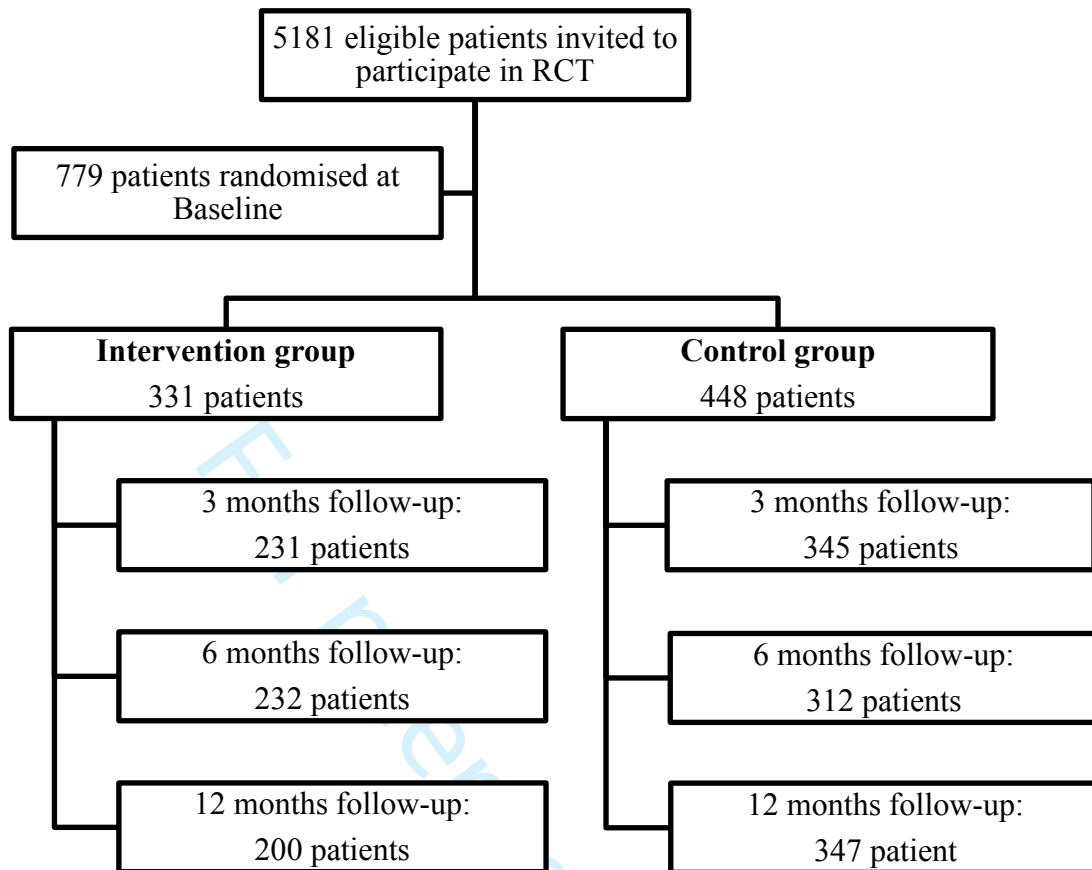

Figure 2. Flow-chart of patient inclusion

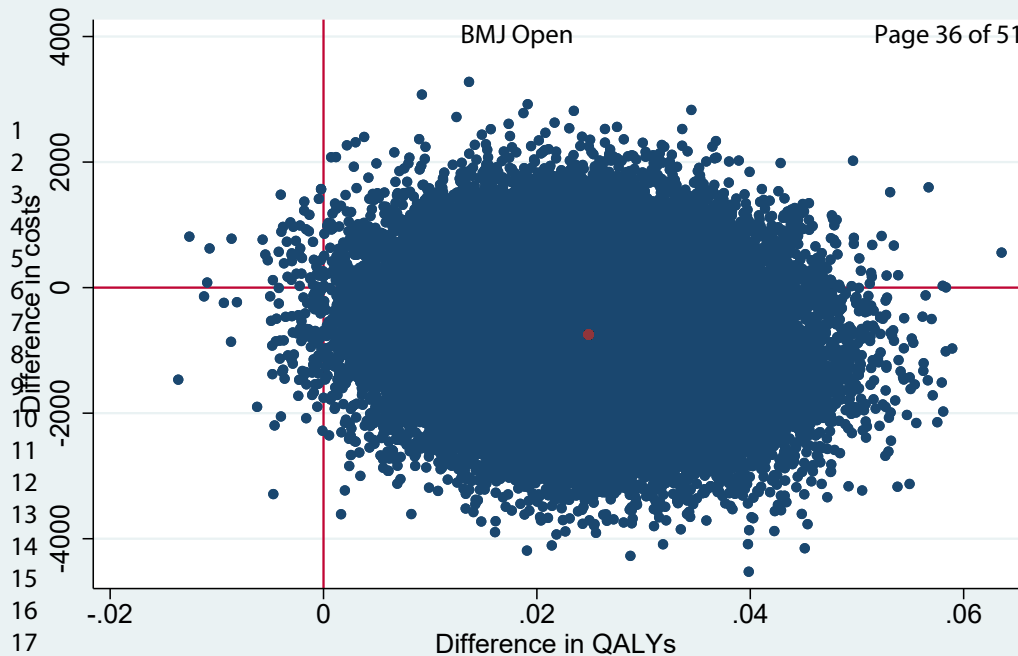

For peer review only - <http://bmjopen.bmj.com/site/about/guidelines.xhtml>

• Bootstrapped estimates • Point estimate

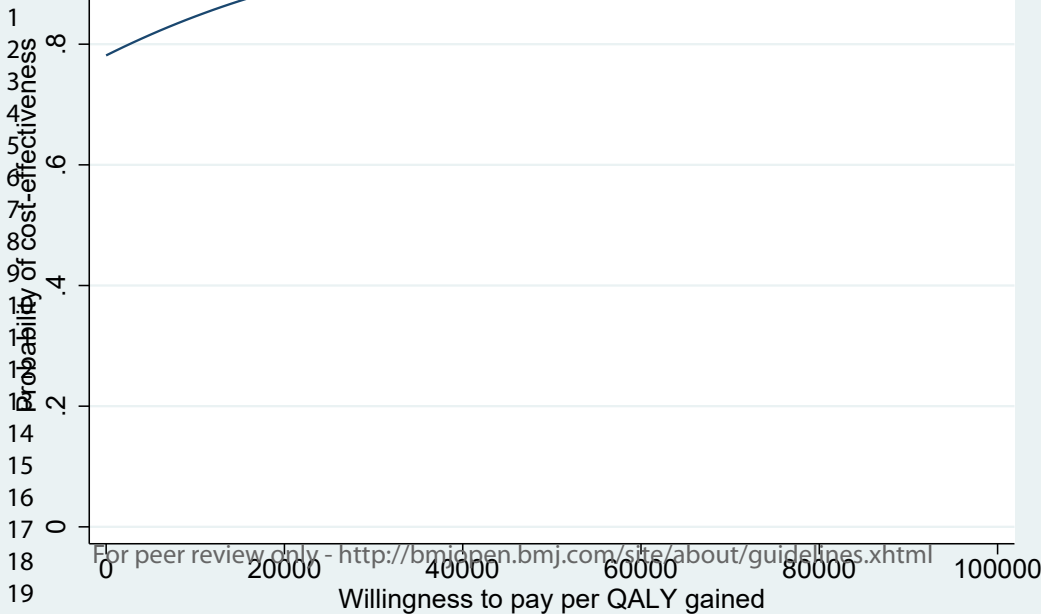

**Table 1: CONSORT 2010 checklist of information to include when reporting a cluster randomised trial**

| Section/Topic                    | Item No | Standard Checklist item                                                                                                                | Extension for cluster designs                                                                   | Page No * |
|----------------------------------|---------|----------------------------------------------------------------------------------------------------------------------------------------|-------------------------------------------------------------------------------------------------|-----------|
| <b>Title and abstract</b>        |         |                                                                                                                                        |                                                                                                 |           |
|                                  | 1a      | Identification as a randomised trial in the title                                                                                      | Identification as a cluster randomised trial in the title                                       | 1         |
|                                  | 1b      | Structured summary of trial design, methods, results, and conclusions (for specific guidance see CONSORT for abstracts) <sup>1,2</sup> | See table 2                                                                                     | 3-4       |
| <b>Introduction</b>              |         |                                                                                                                                        |                                                                                                 |           |
| <b>Background and objectives</b> | 2a      | Scientific background and explanation of rationale                                                                                     | Rationale for using a cluster design                                                            | 6         |
|                                  | 2b      | Specific objectives or hypotheses                                                                                                      | Whether objectives pertain to the cluster level, the individual participant level or both       | 7         |
| <b>Methods</b>                   |         |                                                                                                                                        |                                                                                                 |           |
| <b>Trial design</b>              | 3a      | Description of trial design (such as parallel, factorial) including allocation ratio                                                   | Definition of cluster and description of how the design features apply to the clusters          | 8         |
|                                  | 3b      | Important changes to methods after trial commencement (such as eligibility criteria), with reasons                                     |                                                                                                 | N/A       |
| <b>Participants</b>              | 4a      | Eligibility criteria for participants                                                                                                  | Eligibility criteria for clusters                                                               | 8-9       |
|                                  | 4b      | Settings and locations where the data were collected                                                                                   |                                                                                                 | 8         |
| <b>Interventions</b>             | 5       | The interventions for each group with sufficient details to allow replication, including how and when they were actually administered  | Whether interventions pertain to the cluster level, the individual participant level or both    | 9-10      |
| <b>Outcomes</b>                  | 6a      | Completely defined pre-specified primary and secondary outcome measures, including how and                                             | Whether outcome measures pertain to the cluster level, the individual participant level or both | 10-13     |

|                                         |     |                                                                                                                                                                                             |                                                                                                                                                                                                                         |       |
|-----------------------------------------|-----|---------------------------------------------------------------------------------------------------------------------------------------------------------------------------------------------|-------------------------------------------------------------------------------------------------------------------------------------------------------------------------------------------------------------------------|-------|
|                                         |     | when they were assessed                                                                                                                                                                     |                                                                                                                                                                                                                         |       |
|                                         | 6b  | Any changes to trial outcomes after the trial commenced, with reasons                                                                                                                       |                                                                                                                                                                                                                         | 11    |
| <b>Sample size</b>                      | 7a  | How sample size was determined                                                                                                                                                              | Method of calculation, number of clusters(s) (and whether equal or unequal cluster sizes are assumed), cluster size, a coefficient of intracluster correlation (ICC or <i>k</i> ), and an indication of its uncertainty | 10-11 |
|                                         | 7b  | When applicable, explanation of any interim analyses and stopping guidelines                                                                                                                |                                                                                                                                                                                                                         | N/A   |
| <b>Randomisation:</b>                   |     |                                                                                                                                                                                             |                                                                                                                                                                                                                         |       |
| <b>Sequence generation</b>              | 8a  | Method used to generate the random allocation sequence                                                                                                                                      |                                                                                                                                                                                                                         | 9     |
|                                         | 8b  | Type of randomisation; details of any restriction (such as blocking and block size)                                                                                                         | Details of stratification or matching if used                                                                                                                                                                           | 9     |
| <b>Allocation concealment mechanism</b> | 9   | Mechanism used to implement the random allocation sequence (such as sequentially numbered containers), describing any steps taken to conceal the sequence until interventions were assigned | Specification that allocation was based on clusters rather than individuals and whether allocation concealment (if any) was at the cluster level, the individual participant level or both                              | 9     |
| <b>Implementation</b>                   | 10  | Who generated the random allocation sequence, who enrolled participants, and who assigned participants to interventions                                                                     | Replace by 10a, 10b and 10c                                                                                                                                                                                             | 9     |
|                                         | 10a |                                                                                                                                                                                             | Who generated the random allocation sequence, who enrolled clusters, and who assigned clusters to interventions                                                                                                         | 9     |
|                                         | 10b |                                                                                                                                                                                             | Mechanism by which individual participants were included in clusters for the purposes of the trial (such as complete                                                                                                    | 9     |

|                                                             |     |                                                                                                                                                |                                                                                                                                                                     |       |
|-------------------------------------------------------------|-----|------------------------------------------------------------------------------------------------------------------------------------------------|---------------------------------------------------------------------------------------------------------------------------------------------------------------------|-------|
|                                                             |     | enumeration, random sampling)                                                                                                                  |                                                                                                                                                                     |       |
|                                                             | 10c |                                                                                                                                                | From whom consent was sought (representatives of the cluster, or individual cluster members, or both), and whether consent was sought before or after randomisation | N/A   |
| <b>Blinding</b>                                             | 11a | If done, who was blinded after assignment to interventions (for example, participants, care providers, those assessing outcomes) and how       |                                                                                                                                                                     | 9     |
|                                                             | 11b | If relevant, description of the similarity of interventions                                                                                    |                                                                                                                                                                     | N/A   |
| <b>Statistical methods</b>                                  | 12a | Statistical methods used to compare groups for primary and secondary outcomes                                                                  | How clustering was taken into account                                                                                                                               | 13-14 |
|                                                             | 12b | Methods for additional analyses, such as subgroup analyses and adjusted analyses                                                               |                                                                                                                                                                     | 13-14 |
| <b>Results</b>                                              |     |                                                                                                                                                |                                                                                                                                                                     |       |
| <b>Participant flow (a diagram is strongly recommended)</b> | 13a | For each group, the numbers of participants who were randomly assigned, received intended treatment, and were analysed for the primary outcome | For each group, the numbers of clusters that were randomly assigned, received intended treatment, and were analysed for the primary outcome                         | 15    |
|                                                             | 13b | For each group, losses and exclusions after randomisation, together with reasons                                                               | For each group, losses and exclusions for both clusters and individual cluster members                                                                              | 15    |
| <b>Recruitment</b>                                          | 14a | Dates defining the periods of recruitment and follow-up                                                                                        |                                                                                                                                                                     | 8     |
|                                                             | 14b | Why the trial ended or was stopped                                                                                                             |                                                                                                                                                                     | N/A   |
| <b>Baseline data</b>                                        | 15  | A table showing baseline demographic and clinical                                                                                              | Baseline characteristics for the individual and cluster levels as                                                                                                   | 16-17 |

|                                |     | characteristics for each group                                                                                                                    | applicable for each group                                                                                                                  |       |
|--------------------------------|-----|---------------------------------------------------------------------------------------------------------------------------------------------------|--------------------------------------------------------------------------------------------------------------------------------------------|-------|
| <b>Numbers analysed</b>        | 16  | For each group, number of participants (denominator) included in each analysis and whether the analysis was by original assigned groups           | For each group, number of clusters included in each analysis                                                                               | 15-19 |
| <b>Outcomes and estimation</b> | 17a | For each primary and secondary outcome, results for each group, and the estimated effect size and its precision (such as 95% confidence interval) | Results at the individual or cluster level as applicable and a coefficient of intracluster correlation (ICC or k) for each primary outcome | 15-19 |
|                                | 17b | For binary outcomes, presentation of both absolute and relative effect sizes is recommended                                                       |                                                                                                                                            | 15-19 |
| <b>Ancillary analyses</b>      | 18  | Results of any other analyses performed, including subgroup analyses and adjusted analyses, distinguishing pre-specified from exploratory         |                                                                                                                                            | 15-21 |
| <b>Harms</b>                   | 19  | All important harms or unintended effects in each group (for specific guidance see CONSORT for harms <sup>3</sup> )                               |                                                                                                                                            | N/A   |
| <b>Discussion</b>              |     |                                                                                                                                                   |                                                                                                                                            |       |
| <b>Limitations</b>             | 20  | Trial limitations, addressing sources of potential bias, imprecision, and, if relevant, multiplicity of analyses                                  |                                                                                                                                            | 22-26 |
| <b>Generalisability</b>        | 21  | Generalisability (external validity, applicability) of the trial findings                                                                         | Generalisability to clusters and/or individual participants (as relevant)                                                                  | 22-26 |
| <b>Interpretation</b>          | 22  | Interpretation consistent with results, balancing benefits and harms, and considering other relevant evidence                                     |                                                                                                                                            | 22-26 |
| <b>Other information</b>       |     |                                                                                                                                                   |                                                                                                                                            |       |
| <b>Registration</b>            | 23  | Registration number and                                                                                                                           |                                                                                                                                            | 4     |



|                 |    |                                                                                 |   |
|-----------------|----|---------------------------------------------------------------------------------|---|
|                 |    | name of trial registry                                                          |   |
| <b>Protocol</b> | 24 | Where the full trial protocol can be accessed, if available                     | 4 |
| <b>Funding</b>  | 25 | Sources of funding and other support (such as supply of drugs), role of funders | 4 |

\* Note: page numbers optional depending on journal requirements

For peer review only

**Table 2: Extension of CONSORT for abstracts<sup>1,2</sup> to reports of cluster randomised trials**

| Item                      | Standard Checklist item                                                                                     | Extension for cluster trials                                                                                   |
|---------------------------|-------------------------------------------------------------------------------------------------------------|----------------------------------------------------------------------------------------------------------------|
| <b>Title</b>              | Identification of study as randomised                                                                       | <b>Identification of study as cluster randomised</b>                                                           |
| <b>Trial design</b>       | Description of the trial design (e.g. parallel, cluster, non-inferiority)                                   |                                                                                                                |
| <b>Methods</b>            |                                                                                                             |                                                                                                                |
| <b>Participants</b>       | Eligibility criteria for participants and the settings where the data were collected                        | <b>Eligibility criteria for clusters</b>                                                                       |
| <b>Interventions</b>      | Interventions intended for each group                                                                       |                                                                                                                |
| <b>Objective</b>          | Specific objective or hypothesis                                                                            | <b>Whether objective or hypothesis pertains to the cluster level, the individual participant level or both</b> |
| <b>Outcome</b>            | Clearly defined primary outcome for this report                                                             | <b>Whether the primary outcome pertains to the cluster level, the individual participant level or both</b>     |
| <b>Randomization</b>      | How participants were allocated to interventions                                                            | <b>How clusters were allocated to interventions</b>                                                            |
| <b>Blinding (masking)</b> | Whether or not participants, care givers, and those assessing the outcomes were blinded to group assignment |                                                                                                                |
| <b>Results</b>            |                                                                                                             |                                                                                                                |
| <b>Numbers randomized</b> | Number of participants randomized to each group                                                             | <b>Number of clusters randomized to each group</b>                                                             |
| <b>Recruitment</b>        | Trial status <sup>1</sup>                                                                                   |                                                                                                                |
| <b>Numbers analysed</b>   | Number of participants analysed in each group                                                               | <b>Number of clusters analysed in each group</b>                                                               |
| <b>Outcome</b>            | For the primary outcome, a result for each group and the estimated effect size and its precision            | <b>Results at the cluster or individual participant level as applicable for each primary outcome</b>           |
| <b>Harms</b>              | Important adverse events or side effects                                                                    |                                                                                                                |
| <b>Conclusions</b>        | General interpretation of the results                                                                       |                                                                                                                |
| <b>Trial registration</b> | Registration number and name of trial register                                                              |                                                                                                                |
| <b>Funding</b>            | Source of funding                                                                                           |                                                                                                                |

<sup>1</sup> Relevant to Conference Abstracts

## REFERENCES

---

- 1 Hopewell S, Clarke M, Moher D, Wager E, Middleton P, Altman DG, et al. CONSORT for reporting randomised trials in journal and conference abstracts. *Lancet* 2008, 371:281-283
- 2 Hopewell S, Clarke M, Moher D, Wager E, Middleton P, Altman DG at al (2008) CONSORT for reporting randomized controlled trials in journal and conference abstracts: explanation and elaboration. *PLoS Med* 5(1): e20
- 3 Ioannidis JP, Evans SJ, Gotzsche PC, O'Neill RT, Altman DG, Schulz K, Moher D. Better reporting of harms in randomized trials: an extension of the CONSORT statement. *Ann Intern Med* 2004; 141(10):781-788.

For peer review only

## CHEERS checklist—Items to include when reporting economic evaluations of health interventions

| Section/item                                           | Item No | Recommendation                                                                                                                                                                                                                                                                                                              | Reported on page No/<br>line No |
|--------------------------------------------------------|---------|-----------------------------------------------------------------------------------------------------------------------------------------------------------------------------------------------------------------------------------------------------------------------------------------------------------------------------|---------------------------------|
| <b>Title and abstract</b>                              |         |                                                                                                                                                                                                                                                                                                                             |                                 |
| Title                                                  | 1       | Identify the study as an economic evaluation or use more specific terms such as “cost-effectiveness analysis”, and describe the interventions compared.                                                                                                                                                                     | 1                               |
| Abstract                                               | 2       | Provide a structured summary of objectives, perspective, setting, methods (including study design and inputs), results (including base case and uncertainty analyses), and conclusions.                                                                                                                                     | 3-4                             |
| <b>Introduction</b>                                    |         |                                                                                                                                                                                                                                                                                                                             |                                 |
| Background and objectives                              | 3       | Provide an explicit statement of the broader context for the study.                                                                                                                                                                                                                                                         | 6-7                             |
|                                                        |         | Present the study question and its relevance for health policy or practice decisions.                                                                                                                                                                                                                                       | 6-7                             |
| <b>Methods</b>                                         |         |                                                                                                                                                                                                                                                                                                                             |                                 |
| Target population and subgroups                        | 4       | Describe characteristics of the base case population and subgroups analysed, including why they were chosen.                                                                                                                                                                                                                | 8-9                             |
| Setting and location                                   | 5       | State relevant aspects of the system(s) in which the decision(s) need(s) to be made.                                                                                                                                                                                                                                        | 8                               |
| Study perspective                                      | 6       | Describe the perspective of the study and relate this to the costs being evaluated.                                                                                                                                                                                                                                         | 8-14                            |
| Comparators                                            | 7       | Describe the interventions or strategies being compared and state why they were chosen.                                                                                                                                                                                                                                     | 9-10                            |
| Time horizon                                           | 8       | State the time horizon(s) over which costs and consequences are being evaluated and say why appropriate.                                                                                                                                                                                                                    | 8-14                            |
| Discount rate                                          | 9       | Report the choice of discount rate(s) used for costs and outcomes and say why appropriate.                                                                                                                                                                                                                                  | N/A                             |
| Choice of health outcomes                              | 10      | Describe what outcomes were used as the measure(s) of benefit in the evaluation and their relevance for the type of analysis performed.                                                                                                                                                                                     | 10-14                           |
| Measurement of effectiveness                           | 11a     | <i>Single study-based estimates:</i> Describe fully the design features of the single effectiveness study and why the single study was a sufficient source of clinical effectiveness data.                                                                                                                                  | 8-14                            |
|                                                        | 11b     | <i>Synthesis-based estimates:</i> Describe fully the methods used for identification of included studies and synthesis of clinical effectiveness data.                                                                                                                                                                      | N/A                             |
| Measurement and valuation of preference based outcomes | 12      | If applicable, describe the population and methods used to elicit preferences for outcomes.                                                                                                                                                                                                                                 | N/A                             |
| Estimating resources and costs                         | 13a     | <i>Single study-based economic evaluation:</i> Describe approaches used to estimate resource use associated with the alternative interventions. Describe primary or secondary research methods for valuing each resource item in terms of its unit cost. Describe any adjustments made to approximate to opportunity costs. | 12-14                           |
|                                                        | 13b     | <i>Model-based economic evaluation:</i> Describe approaches and data sources used to estimate                                                                                                                                                                                                                               | N/A                             |

| Section/item                                                         | Item No | Recommendation                                                                                                                                                                                                                                                                                                                                        | Reported on page No/<br>line No |
|----------------------------------------------------------------------|---------|-------------------------------------------------------------------------------------------------------------------------------------------------------------------------------------------------------------------------------------------------------------------------------------------------------------------------------------------------------|---------------------------------|
|                                                                      |         | resource use associated with model health states. Describe primary or secondary research methods for valuing each resource item in terms of its unit cost. Describe any adjustments made to approximate to opportunity costs.                                                                                                                         |                                 |
| Currency, price date, and conversion                                 | 14      | Report the dates of the estimated resource quantities and unit costs. Describe methods for adjusting estimated unit costs to the year of reported costs if necessary. Describe methods for converting costs into a common currency base and the exchange rate.                                                                                        | 10-14                           |
| Choice of model                                                      | 15      | Describe and give reasons for the specific type of decision-analytical model used. Providing a figure to show model structure is strongly recommended.                                                                                                                                                                                                | N/A                             |
| Assumptions                                                          | 16      | Describe all structural or other assumptions underpinning the decision-analytical model.                                                                                                                                                                                                                                                              | N/A                             |
| Analytical methods                                                   | 17      | Describe all analytical methods supporting the evaluation. This could include methods for dealing with skewed, missing, or censored data; extrapolation methods; methods for pooling data; approaches to validate or make adjustments (such as half cycle corrections) to a model; and methods for handling population heterogeneity and uncertainty. | 10-14                           |
| <b>Results</b>                                                       |         |                                                                                                                                                                                                                                                                                                                                                       |                                 |
| Study parameters                                                     | 18      | Report the values, ranges, references, and, if used, probability distributions for all parameters. Report reasons or sources for distributions used to represent uncertainty where appropriate. Providing a table to show the input values is strongly recommended.                                                                                   | 19-21                           |
| Incremental costs and outcomes                                       | 19      | For each intervention, report mean values for the main categories of estimated costs and outcomes of interest, as well as mean differences between the comparator groups. If applicable, report incremental cost-effectiveness ratios.                                                                                                                | 19-21                           |
| Characterising uncertainty                                           | 20a     | <i>Single study-based economic evaluation:</i> Describe the effects of sampling uncertainty for the estimated incremental cost and incremental effectiveness parameters, together with the impact of methodological assumptions (such as discount rate, study perspective).                                                                           | 19-21                           |
|                                                                      | 20b     | <i>Model-based economic evaluation:</i> Describe the effects on the results of uncertainty for all input parameters, and uncertainty related to the structure of the model and assumptions.                                                                                                                                                           | N/A                             |
| Characterising heterogeneity                                         | 21      | If applicable, report differences in costs, outcomes, or cost-effectiveness that can be explained by variations between subgroups of patients with different baseline characteristics or other observed variability in effects that are not reducible by more information.                                                                            | 19-21                           |
| <b>Discussion</b>                                                    |         |                                                                                                                                                                                                                                                                                                                                                       |                                 |
| Study findings, limitations, generalisability, and current knowledge | 22      | Summarise key study findings and describe how they support the conclusions reached. Discuss limitations and the generalisability of the findings and how the findings fit with current knowledge.                                                                                                                                                     | 22-26                           |
| <b>Other</b>                                                         |         |                                                                                                                                                                                                                                                                                                                                                       |                                 |
| Source of funding                                                    | 23      | Describe how the study was funded and the role of                                                                                                                                                                                                                                                                                                     | 4                               |

| Section/item                                                                                                     | Item No | Recommendation                                                                                                                                                                                                                                    | Reported on page No/<br>line No |
|------------------------------------------------------------------------------------------------------------------|---------|---------------------------------------------------------------------------------------------------------------------------------------------------------------------------------------------------------------------------------------------------|---------------------------------|
|                                                                                                                  |         | the funder in the identification, design, conduct, and reporting of the analysis. Describe other non-monetary sources of support.                                                                                                                 |                                 |
| Conflicts of interest                                                                                            | 24      | Describe any potential for conflict of interest of study contributors in accordance with journal policy. In the absence of a journal policy, we recommend authors comply with International Committee of Medical Journal Editors recommendations. | 4-5                             |
| For consistency, the CHEERS statement checklist format is based on the format of the CONSORT statement checklist |         |                                                                                                                                                                                                                                                   |                                 |

For peer review only

| <b>Intervention component</b>                | <b>Cost category</b> | <b>Units</b>          | <b>Unit prices</b> | <b>Total costs (Euros 2016)</b> | <b>Costs per patient (Euros 2016)</b> |
|----------------------------------------------|----------------------|-----------------------|--------------------|---------------------------------|---------------------------------------|
| <i>Professional intervention</i>             |                      |                       |                    |                                 |                                       |
| <i>Development costs</i>                     |                      |                       |                    |                                 |                                       |
| CME training material by Junior reseacher ** | Labor costs          | 6 months              | 2.618,- per month  | 15.708,00                       | 0,01                                  |
|                                              |                      |                       |                    |                                 |                                       |
| <i>Training costs</i>                        |                      |                       |                    |                                 |                                       |
| Accreditation by professional associations * | Capital costs        | 1                     | 484,-              | 484,00                          | 1,51                                  |
| Training material *                          | Capital costs        | 96                    | 9,03               | 866,26                          | 2,71                                  |
| Printing training material *                 | Capital costs        | 96                    | 4,46               | 428,20                          | 1,34                                  |
| Training locations *                         | Capital costs        | 7                     | 51,86              | 363,00                          | 1,14                                  |
| Catering during training *                   | Capital costs        | 7                     | 164,91             | 1.154,35                        | 3,61                                  |
| Participation costs GPs *                    | Labor costs          | 31 GPs/3 hours per GP | 81,75/hour         | 7.602,75                        | 23,76                                 |
| Participating costs OPs *                    | Labor costs          | 23 OPs/3 hours per OP | 81,75/hour         | 5.640,75                        | 17,63                                 |

|                                               |               |                          |                      |           |      |
|-----------------------------------------------|---------------|--------------------------|----------------------|-----------|------|
| Participating costs PTs *                     | Labor costs   | 42 PTs/3 hours per<br>PT | 22,22/hour           | 2.799,72  | 8,75 |
| Participating costs Junior researcher *       | Labor costs   | 18 hours                 | 33,63/hour           | 605,34    | 1,89 |
| Participating costs Senior researcher *       | Labor costs   | 12 hours                 | 68,49/hour           | 821,88    | 2,57 |
| Participating costs Principal Investigator *  | Labor costs   | 12 hours                 | 126,26/hour          | 1.515,12  | 4,74 |
| <i>Patient intervention</i>                   |               |                          |                      |           |      |
| <i>Development costs</i>                      |               |                          |                      |           |      |
| Intervention material by Junior researcher ** | Labor costs   | 6 months                 | 2.618,- per<br>month | 15.708,00 | 0,01 |
| Videomessages by professionals actors **      | Labor costs   | 12 actors                | 139,67               | 1.675,98  | 0,01 |
| Traveling expenses professional actors **     | Capital costs | 12 actors                | 7,56                 | 90,62     | 0,01 |
| Development of videomessages **               | Capital costs | 12 videos                | 610,78               | 7.329,41  | 0,01 |
| Development of voice-over videomessages **    | Capital costs | 12 videos                | 58,38                | 700,60    | 0,01 |
| Development of translations **                | Capital costs | 1                        | 430,-                | 430,00    | 0,01 |
| <i>Intervention costs</i>                     |               |                          |                      |           |      |



|                                                                        |               |         |              |           |       |
|------------------------------------------------------------------------|---------------|---------|--------------|-----------|-------|
| Website hosting **                                                     | Capital costs | 3 years | 193,92       | 581,75    | 0,01  |
|                                                                        |               |         |              |           |       |
| <b>Total intervention costs</b>                                        |               |         | <b>Total</b> | 64.505,73 | 69,73 |
|                                                                        |               |         |              |           |       |
| * Costs per patient                                                    |               |         |              |           |       |
| ** Costs per patient for all patients in the Netherlands (n=2 million) |               |         |              |           |       |

| <b>Unit</b>                      | <b>Price weight (€, 2016)</b>        |
|----------------------------------|--------------------------------------|
| Intervention costs (per patient) | 69,73                                |
| <i>Medical costs</i>             |                                      |
| <i>General practitioner</i>      |                                      |
| Office consultation              | 33,31                                |
| Telephone consultation           | 17,16                                |
| House call                       | 50,46                                |
| Occupational physician           | 25,84                                |
| Physiotherapist                  | 33,31                                |
| Occupational therapist           | 33,31                                |
| Dietician                        | 29,95                                |
| Homeopath                        | 67,08                                |
| Psychologist                     | 93,17                                |
| Psychotherapist                  | 84,74                                |
| Psychiatrist                     | 94,87                                |
| Other medical specialists        | 91,84                                |
| Emergency room                   | 261,40                               |
| Outpatient clinic visit          | 91,84                                |
| Hospitalization (per day)        | 480,41                               |
| <i>Medication</i>                |                                      |
| Medication                       | Variable                             |
| <i>Alternative care</i>          |                                      |
| Alternative care                 | Variable                             |
| <i>Absenteeism costs</i>         |                                      |
| Sick leave days                  | Variable, depended on gender and age |
| <i>Presenteeism costs</i>        |                                      |
| Presenteeism score               | Variable, depended on gender and age |
