# Supplementary material for: Effectiveness and cost-utility of a multifaceted eHealth strategy to improve back pain beliefs of patients with non-specific low back pain: a cluster randomised trial
Source: PubMed Central journal article supplement — BMJ Open. 2019 Dec 5;9(12):e030879. doi: 10.1136/bmjopen-2019-030879 (PMC6924789; doi:10.1136/bmjopen-2019-030879), 2019-12-05
Supplement: bmjopen-2019-030879supp003.pdf [file bmjopen-2019-030879supp003.pdf]

| <b>Intervention component</b>                | <b>Cost category</b> | <b>Units</b>          | <b>Unit prices</b> | <b>Total costs (Euros 2016)</b> | <b>Costs per patient (Euros 2016)</b> |
|----------------------------------------------|----------------------|-----------------------|--------------------|---------------------------------|---------------------------------------|
| <i>Professional intervention</i>             |                      |                       |                    |                                 |                                       |
| <i>Development costs</i>                     |                      |                       |                    |                                 |                                       |
| CME training material by Junior reseacher ** | Labor costs          | 6 months              | 2.618,- per month  | 15.708,00                       | 0,01                                  |
|                                              |                      |                       |                    |                                 |                                       |
| <i>Training costs</i>                        |                      |                       |                    |                                 |                                       |
| Accreditation by professional associations * | Capital costs        | 1                     | 484,-              | 484,00                          | 1,51                                  |
| Training material *                          | Capital costs        | 96                    | 9,03               | 866,26                          | 2,71                                  |
| Printing training material *                 | Capital costs        | 96                    | 4,46               | 428,20                          | 1,34                                  |
| Training locations *                         | Capital costs        | 7                     | 51,86              | 363,00                          | 1,14                                  |
| Catering during training *                   | Capital costs        | 7                     | 164,91             | 1.154,35                        | 3,61                                  |
| Participation costs GPs *                    | Labor costs          | 31 GPs/3 hours per GP | 81,75/hour         | 7.602,75                        | 23,76                                 |
| Participating costs OPs *                    | Labor costs          | 23 OPs/3 hours per OP | 81,75/hour         | 5.640,75                        | 17,63                                 |

|                                               |               |                          |                      |           |      |
|-----------------------------------------------|---------------|--------------------------|----------------------|-----------|------|
| Participating costs PTs *                     | Labor costs   | 42 PTs/3 hours per<br>PT | 22,22/hour           | 2.799,72  | 8,75 |
| Participating costs Junior researcher *       | Labor costs   | 18 hours                 | 33,63/hour           | 605,34    | 1,89 |
| Participating costs Senior researcher *       | Labor costs   | 12 hours                 | 68,49/hour           | 821,88    | 2,57 |
| Participating costs Principal Investigator *  | Labor costs   | 12 hours                 | 126,26/hour          | 1.515,12  | 4,74 |
| <i>Patient intervention</i>                   |               |                          |                      |           |      |
| <i>Development costs</i>                      |               |                          |                      |           |      |
| Intervention material by Junior researcher ** | Labor costs   | 6 months                 | 2.618,- per<br>month | 15.708,00 | 0,01 |
| Videomessages by professionals actors **      | Labor costs   | 12 actors                | 139,67               | 1.675,98  | 0,01 |
| Traveling expenses professional actors **     | Capital costs | 12 actors                | 7,56                 | 90,62     | 0,01 |
| Development of videomessages **               | Capital costs | 12 videos                | 610,78               | 7.329,41  | 0,01 |
| Development of voice-over videomessages **    | Capital costs | 12 videos                | 58,38                | 700,60    | 0,01 |
| Development of translations **                | Capital costs | 1                        | 430,-                | 430,00    | 0,01 |
| <i>Intervention costs</i>                     |               |                          |                      |           |      |

|                                                                        |               |         |              |           |       |
|------------------------------------------------------------------------|---------------|---------|--------------|-----------|-------|
| Website hosting **                                                     | Capital costs | 3 years | 193,92       | 581,75    | 0,01  |
|                                                                        |               |         |              |           |       |
| <b>Total intervention costs</b>                                        |               |         | <b>Total</b> | 64.505,73 | 69,73 |
|                                                                        |               |         |              |           |       |
| * Costs per patient                                                    |               |         |              |           |       |
| ** Costs per patient for all patients in the Netherlands (n=2 million) |               |         |              |           |       |
