# Supplementary material for: Effectiveness and cost-utility of a multifaceted eHealth strategy to improve back pain beliefs of patients with non-specific low back pain: a cluster randomised trial
Source: PubMed Central journal article supplement — BMJ Open. 2019 Dec 5;9(12):e030879. doi: 10.1136/bmjopen-2019-030879 (PMC6924789; doi:10.1136/bmjopen-2019-030879), 2019-12-05
Supplement: bmjopen-2019-030879supp004.pdf [file bmjopen-2019-030879supp004.pdf]

| <b>Unit</b>                      | <b>Price weight (€, 2016)</b>        |
|----------------------------------|--------------------------------------|
| Intervention costs (per patient) | 69,73                                |
|                                  |                                      |
| <i>Medical costs</i>             |                                      |
| General practitioner             |                                      |
| Office consultation              | 33,31                                |
| Telephone consultation           | 17,16                                |
| House call                       | 50,46                                |
| Occupational physician           | 25,84                                |
| Physiotherapist                  | 33,31                                |
| Occupational therapist           | 33,31                                |
| Dietician                        | 29,95                                |
| Homeopath                        | 67,08                                |
| Psychologist                     | 93,17                                |
| Psychotherapist                  | 84,74                                |
| Psychiatrist                     | 94,87                                |
| Other medical specialists        | 91,84                                |
| Emergency room                   | 261,40                               |
| Outpatient clinic visit          | 91,84                                |
| Hospitalization (per day)        | 480,41                               |
|                                  |                                      |
| Medication                       | Variable                             |
| Alternative care                 | Variable                             |
|                                  |                                      |
| <i>Absenteeism costs</i>         |                                      |
| Sick leave days                  | Variable, depended on gender and age |
|                                  |                                      |
| <i>Presenteeism costs</i>        |                                      |
| Presenteeism score               | Variable, depended on gender and age |
